# Supplementary material
Source: PubMed Central journal article supplement (PMC2653261)
Supplement: NIHMS85277-supplement-supplement_1.pdf [file NIHMS85277-supplement-supplement_1.pdf]

## SUPPLEMENTARY METHODS

### Classifier Generation and Supervised Learning Methods

We have previously reported on the use of pattern recognition and a supervised learning strategy to develop a predictive rule based on a set of DNA sequence patterns that discriminate methylation-prone (MP) and methylation-resistant (MR) sequences (1). The training set consisted of sequences representing 4kb genomic windows encompassing nine MP and nine MR CpG islands (1). The approach consisted of 3 steps.

A general-purpose pattern recognition algorithm (described in (2,3)) was used to identify common sequence patterns within the training CpG islands. The algorithm treats multiple sequence comparisons as an evolutionary distance problem in which the goal is to derive the most likely ancestor that could have given rise to a set of sequences. This is referred to as the "minimum weight common mutated sequence" (MWCMS) model. Given a set of input sequences, the model seeks to mutate every input sequence to the same *a priori* unknown sequence using the operations of insertion, deletion, and substitution. Weights are assigned for each operation, and the total weight associated with all mutations is to be minimized. The method allows for non-consecutive sequence strings with various physical constraints (minimum length, distance from center, etc.) and can be set to return the longest (or some preset length) common exact-match sequence string. For this study, the criteria were set to return exact match sequence patterns 7-12 bp in length, allowing N for any base pair substitution, with control on the frequency of such substitutions. This process identified thousands of patterns of 7-12bp in the training sample.

The identified DNA patterns were then input into a machine learning environment consisting of a feature selection algorithm (involving a combinatorial decision tree analysis (4))

coupled with an optimization-based discrete support vector machine classification engine, DAMIP (described in 5-9). DAMIP has several distinct features, including the ability to classify any number of distinct groups, the ability to incorporate heterogeneous types of attributes as input, a high-dimensional data transformation that reduces noise and errors in biological data, the ability to incorporate constraints to limit the misclassification rate, a reserved-judgment region that provides a safeguard against over-training, and successive multi-stage classification capability to handle data points placed in the reserved judgment region. DAMIP has been shown to be a powerful supervised learning approach in predicting various biomedical and bio-behavior phenomena (1,10-12).

The computational design used the ‘wrapper approach’, where the feature selection algorithm was coupled directly to the DAMIP classification module. In this approach, the feature selection algorithm selects a subset of the DNA sequence patterns. An attribute vector is then formed from the frequency of occurrence of these patterns in each CpG island sequence in the training set, which then serve as the attribute input into the DAMIP classification engine. The accuracy of the resulting classifier is estimated via 10-fold cross validation. This process is repeated with the feature selection algorithm selecting a new subset of patterns, and the DAMIP engine returning the corresponding classifier and associated 10-fold cross-validation accuracy. Thus, at each step, guided by the estimated accuracy (as a measure of goodness), the machine ‘learns’ as the feature selection algorithm searches through the space of possible subsets for an improved feature set (*i.e.* that which provides improved cross-validation accuracy). The process continues until a pre-set maximum number of iterations is reached, or a minimum correct classification percentage is achieved. The solution at termination provides the current-best discriminatory feature set with the associated classification rule returned from the DAMIP

module. In this case, we set the maximum number of iterations at 100,000 and the minimum classification accuracy at 90%. The system returned a classification rule with a set of seven discriminatory patterns (TCCCCNC, TTTCCTNC, TCCNCCNCCC, GGAGNAAG, GAGANAAG, GCCACCCC, GAGGAGGNNG) that achieved an accuracy of 89% in the 10-fold cross-validation tests. We refer to this classification rule as PatMAN, for Pattern-based Methylation Analysis.

To generate the SUPER-PatMAN classifier, attribute vectors based on the frequencies of the same 7 sequence patterns noted above and SUZ12 binding status (positive for enrichment, negative for enrichment, or no data/uninformative) for each CpG island in the training set were used as direct input into the DAMIP classification engine. To facilitate direct comparison of the classification accuracy resulting from the two sets of discriminatory patterns (7 patterns, versus 7 patterns + SUZ12), the same 9MP and 9MR CpG islands were used as the training set. SUPER-PatMAN achieved an accuracy of 83% in 10-fold cross-validation tests. The PatMAN and SUPER-PatMAN classifiers were then applied to genomic sequences corresponding to CpG islands derived from the entire genome (n=37,530).

**Annotation of CpG islands for SUZ12 binding status.** SUZ12 ChIP-chip data from human embryonic stem cells (13) was obtained from <http://www.ebi.ac.uk/arrayexpress> in the form of raw probe signal intensities for 115 arrays containing a total of  $4.5 \times 10^6$  60-mers spaced at ~350 bp intervals and covering ~90% of the non-repetitive fraction of the human genome. Custom PERL programs were utilized to  $\log_2$  transform probe signal intensity ratios, calculate the mean for each microarray, subtract the difference between the mean and zero from each probe value, and sort probes by chromosome and start position. SUZ12 enriched and non-enriched regions

were identified with a modified version of the PERL-implementation of the ChIPOTle program (14). This analysis calculated chromosome-specific background standard deviation values by analyzing negative probe values since enriched regions in ChIP-chip experiments should have positive probe values. Using a sliding window (1,000bp window, 225bp step), window p-values were calculated, a multiple testing-corrected significance threshold was calculated, significant windows were identified, and adjacent significant windows were collapsed into a single enriched region. Additional criteria filters were implemented that required that a minimum of 2 probes be present per window for the window to be considered informative (although the majority had at least 3), and that 2 probes within the window have values  $\geq 2 \times$  background standard deviation. This analysis identified 4,350 SUZ12-enriched regions of average length = 1,313bp.

To annotate CpG islands for SUZ12 occupancy status, CpG islands were extracted from the human genome (UCSC HG17; criteria: length  $\geq$  500bp, GC content  $\geq$  55%, and CpG Obs/Exp  $\geq$  0.65) and assessed for proximity to enriched and non-enriched SUZ12 regions. CpG islands that were overlapping or within 1kb of a SUZ12-enriched region were considered SUZ12-enriched. Non-enriched CpG islands were then assessed for proximity (within 1kb) to SUZ12 non-enriched regions. Remaining CpG islands that were not within 1kb of either enriched or non-enriched region had insufficient SUZ12 binding data and were labeled as uninformative. These analyses allowed for the annotation of SUZ12 binding data for 93% of CpG islands in the genome, Based on this analysis there were 3,642 SUZ12 (+) CpG islands, 31,238 SUZ12 (-) CpG islands, and the remaining 2,650 had insufficient data.

Similar analyses were performed to determine CTCF occupancy status of CpG islands. Genome-wide CTCF binding has been previously reported (15). Based on criteria established by Kim et al. (15), additional criteria filters were implemented in the ChIPOTle analysis that

required that a minimum of 4 probes per window for the window to be considered informative, and that 4 probes within the window have values  $\geq 2.5 \times$  background standard deviation.

**Functional annotation of gene ontology terms.** The Database for Annotation, Visualization and Integrated Discovery (DAVID) Bioinformatics Database (<http://david.abcc.ncifcrf.gov>) (16) was utilized to identify gene ontology and functional annotation terms significantly enriched among MP CpG islands. Gene symbols corresponding to 63 CpG islands methylated in at least 2 of 3 independent DNMT1-overexpressing clones was used as input. Program settings were as follows: Homo sapiens, Gene Ontology Molecular Function Term level 2, Protein Domains InterPro name, Functional Categories SP\_PIR\_Keywords. Data analysis and filtering included the consolidation of redundant terms with retention of that with the lowest p-value and exclusion of categories that were non-informative (e.g. disease mutations, alternative splicing), occurred at less than 5%, or had p-values  $>0.01$ .

## REFERENCES

1. Feltus, F. A., E. K. Lee, J. F. Costello, C. Plass, and P. M. Vertino (2003). "Predicting Aberrant CpG Island Methylation". *Proceedings of the National Academy of Sciences*, 100(21):12253-8.
2. Lee, E. K., T. Easton, E. L. Johnson (2002). Combinatorial approach to the minimum weight common mutated sequence problem and its application to DNA sequencing problems. Georgia Tech software report.
3. Lee, E. K., T. Easton, K. Gupta (2006). Novel evolutionary models and applications to sequence alignment problems. *Operations Research in Medicine -- Computing and Optimization in Medicine and Life Sciences*, 148: 167-187, 2006.
4. EK Lee, Branch-and-bound methods (2001). In *Handbook of Applied Optimization*. Editors: Mauricio G. C. Resende and Panos M. Pardalos. Oxford University Press.
5. Gallagher, R. J., E. K. Lee, and D. Patterson (1996). An Optimization Model for Constrained Discriminant Analysis and Numerical Experiments with Iris, Thyroid, and Heart Disease Datasets. In: Cimino JJ. Ed. *Proceedings of the 1996 American Medical Informatics Association*, 209-213.
6. Gallagher, R. J., E. K. Lee, and D.A. Patterson (1997). Constrained discriminant analysis via 0/1 mixed integer programming. *Annals of Operations Research, Special Issue on Non-Traditional Approaches to Statistical Classification and Regression*, 74, 65-88.
7. Lee, E. K., R. J. Gallagher, and D. Patterson (2003). "A Linear Programming Approach to Discriminant Analysis with a Reserved Judgment Region". *INFORMS Journal on Computing*, 15(1), 23-41.
8. Lee, E. K. (2007a). Large-Scale Optimization-Based Classification Models in Medicine and Biology. *Annals of Biomedical Engineering, Systems Biology and Bioinformatics*, 35(6): 1095-1109, 2007.
9. Lee, E. K. (2007b). Optimization-Based Predictive Models in Medicine and Biology. *Optimization in Medicine, Springer Series in Optimization and Its Application*, 12: 127-151.
10. Lee, E. K., A. Y. C. Fung, J. P. Brooks, and M. Zaider (2002). Automated Tumor Volume Contouring in Soft-Tissue Sarcoma Adjuvant Brachytherapy Treatment. *International Journal of Radiation Oncology, Biology and Physics*, 47(11), 1891 -1910.
11. Lee, E. K., R. Gallagher, A. Campbell, and M. Prausnitz (2004). "Prediction of ultrasound-mediated disruption of cell membranes using machine learning techniques and statistical analysis of acoustic spectra". *IEEE Transactions on Biomedical Engineering*, 51(1), 1-9.
12. Lee, E. K., T. L. Wu (2006). Classification and disease prediction via mathematical programming. *Data Mining, Systems Analysis, and Optimization in Biomedicine*. Editors: O Seref, OE Kundakcioglu and P Pardalos. *AIP Conference Proceedings* 953:1-42, 2007.
13. Lee, T.I. et al. Control of developmental regulators by Polycomb in human embryonic stem cells. *Cell* 125, 301-13 (2006).
14. Buck, M.J., Nobel, A.B. & Lieb, J.D. ChIPOTle: a user-friendly tool for the analysis of ChIP-chip data. *Genome Biol* 6, R97 (2005).
15. Kim, T.H. et al. Analysis of the vertebrate insulator protein CTCF-binding sites in the human genome. *Cell* 128, 1231-45 (2007).
16. Dennis, G., Jr. et al. DAVID: Database for Annotation, Visualization, and Integrated Discovery. *Genome Biol* 4, P3 (2003).

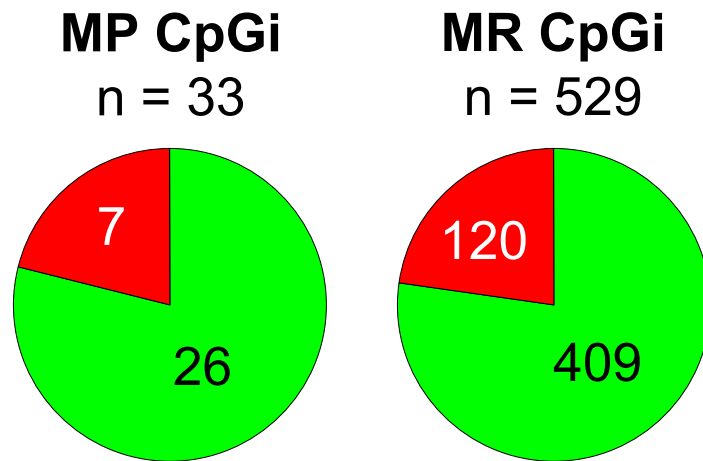

**Supplementary Figure 1. CTCF binding does not correlate with CpG island methylation status.** DNA fragments identified as methylation-prone or methylation-resistant by RLGS analysis were assessed for proximity to CTCF-enriched regions as defined by genome-wide ChIP-chip studies. Both methylation-prone and methylation-resistant fragments showed similar enrichment for CTCF (21% and 23%, respectively). The red fraction is enriched for CTCF, whereas the green fraction is not enriched for CTCF.

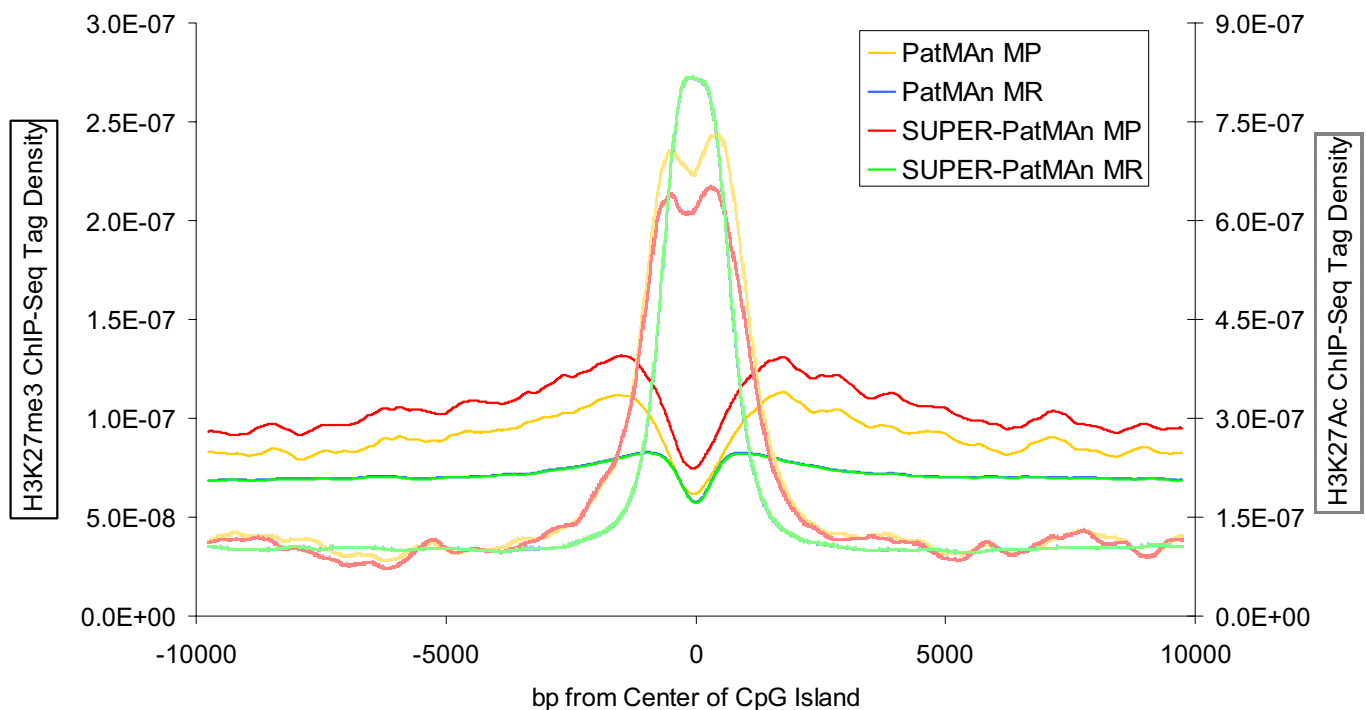

**Supplementary Figure 2. Association of H3K27 histone modifications surrounding PatMAN and SUPER-PatMAN predictions.** All human CpG islands were aligned by their centers and the average number of H3K27me3 or H3K27Ac ChIP-Seq tags was calculated extending out 10kb in each direction. H3K27me3 data is depicted by solid lines while H3K27Ac data is depicted by hashed lines.



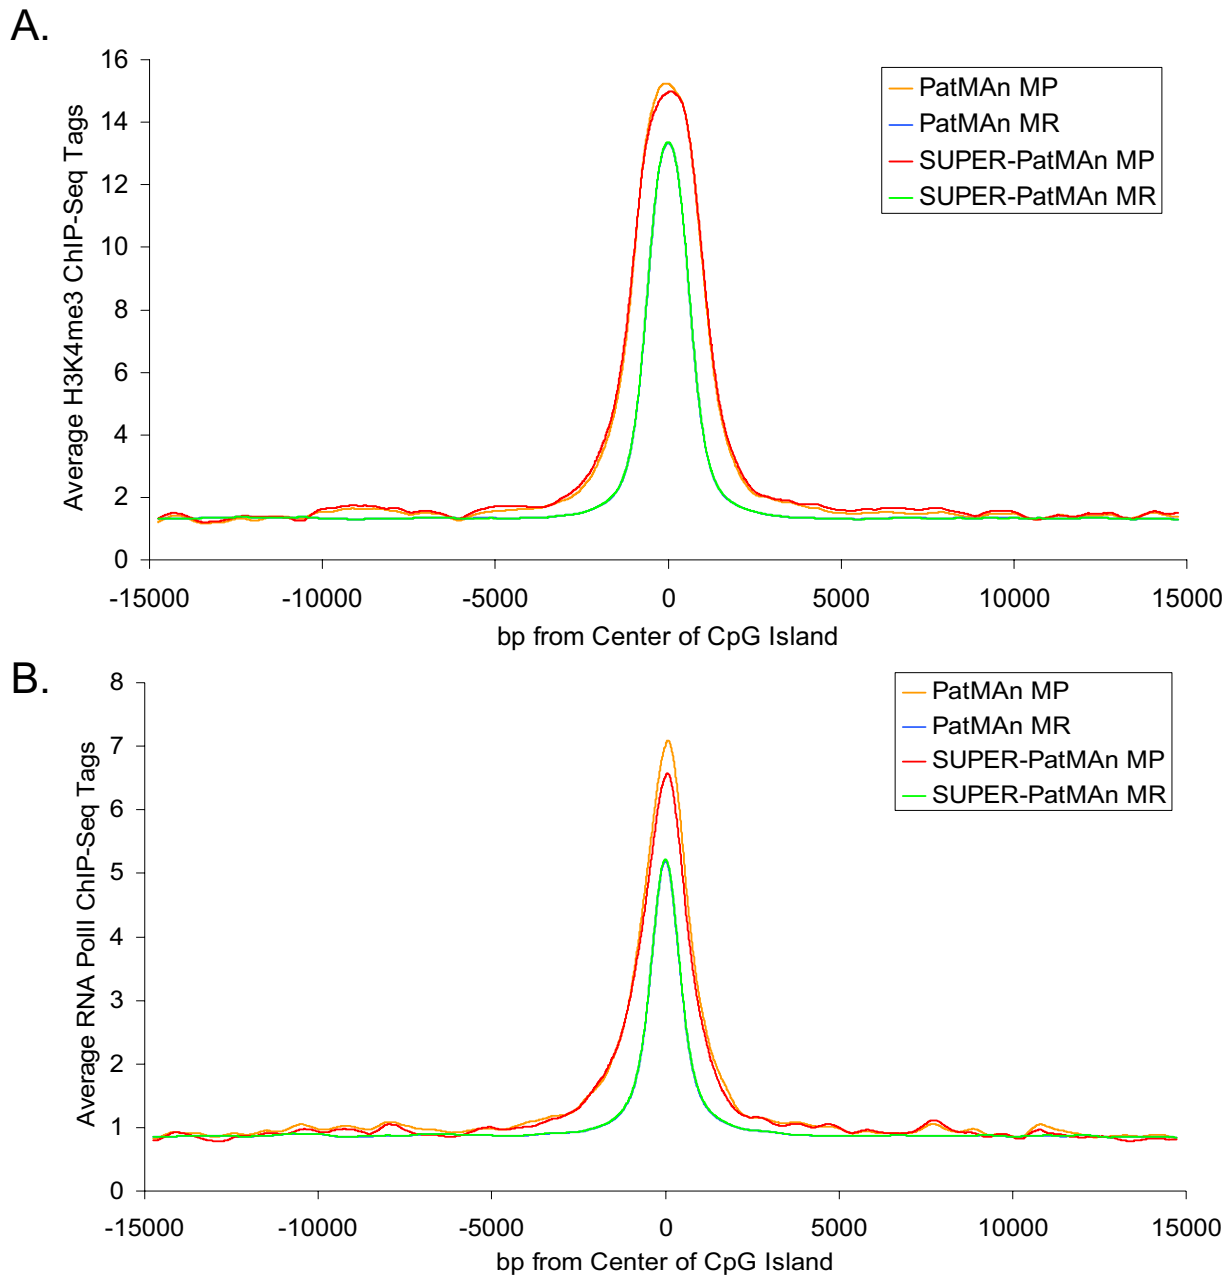

**Supplementary Figure 3. Correlation of H3K4me3 and PolIII binding with PatMAN and SUPER-PatMAN predictions.** CpG islands predicted by PatMAN or SUPER-PatMAN to be methylation-prone or methylation-resistant were assessed for proximity to **A**, H3K4me3- or **B**, PolIII-enriched regions as defined by a genome-wide ChIP-seq study in CD4<sup>+</sup> T cells (Barski et al, Cell, 823-837, 2007). CpG islands predicted to be methylation-prone and methylation-resistant by both classifiers showed similar enrichment for both H3K4me3 and PolIII.

**Supplementary Table 1. MSP Primers.**

| CpG Island | Methylation Status | Sense                      | Antisense                  |
|------------|--------------------|----------------------------|----------------------------|
| ADAMTS5    | Unmethylated       | GAGTTGTGAGGTTAGTGTGTGT     | ATAAATCCACACAAATCCTACACA   |
|            | Methylated         | GTTGCGAGGTTAGTGTTCGCG      | AATCCGCACGAATCCTACACG      |
| AGPAT3     | Unmethylated       | TATAAGGTATTGGGTGTAGGAGGT   | CACTATATCAACACTTAACCATAACA |
|            | Methylated         | AAGGTATCGGGCGTAGGAGGC      | CTATATCGACACTTAACCGTAACG   |
| ERG        | Unmethylated       | GTGAAAATGGTTGTGATATTAAGAT  | CAAACCAAACCACAATACCCTCA    |
|            | Methylated         | GAAAACGGTTGCGATATTAAGAC    | AACCAAACCGCGATACCCTCG      |
| HSF2BP     | Unmethylated       | AATTTTGGTAATTGAAAGGTAGTGTT | ATACCCTTCTCACTAAACACCAACCA |
|            | Methylated         | TTTGGTAATCGAAAGGTAGCGTC    | CCCTTCTCGCTAAACGCCAACCG    |
| ICOSLG     | Unmethylated       | GAGATTGTTTTGGGATAGGAGGT    | ACACAACCAACCAAAAAACCTAACA  |
|            | Methylated         | GATCGTTTCGGGATAGGAGGC      | GCAACCGACCAAAAAACCTAACG    |
| PKNOX1     | Unmethylated       | TGTGGGTTTTGATTGTTGTAGTT    | CCTCCAAACCCAAAACAACAACA    |
|            | Methylated         | CGGGTTTCGATTGTTGTAGTC      | CTCCAAACCCGAACGACAACG      |
| SIM2       | Unmethylated       | GGGTTTTGTGGGTTTGGAGTAT     | AACCACAACAACCCCTCTAACAACA  |
|            | Methylated         | GGTTTCGCGGGTTTGGAGTAC      | CCGCGACAACCCCTCTAACAACG    |
| RUNX1      | Unmethylated       | ATTTAGTTTTTGGATTTTGGTTTT   | AACACCCAAAAACAATCCCTACA    |
|            | Methylated         | TAGTTTTTCGGATTTTCGGTTTC    | CGCCCGAAAACAATCCCTACG      |
| SIM2 Exon2 | Unmethylated       | GTATAGATGGTGGTTGTGGAGTT    | AATCCCAACTCCTTAACAACACCA   |
|            | Methylated         | ATAGATGGCGGTTGCGGAGTC      | CCCAACTCCTTAACGACGCCG      |
| CECR6      | Unmethylated       | GGTAGTAGGAGGTGTTGTTGTT     | ACAACCTCCCAACAACAACACACA   |
|            | Methylated         | GTAGTAGGAGGCGTCGTTGTC      | GACTCCCCGAACAACAACACG      |
| TIMP3      | Unmethylated       | AGTTTGGGTTGTAGTAGTTTTGTT   | CTAACTACAACATAAAACTCAAACA  |
|            | Methylated         | TTCGGGTTGTAGTAGTTTCGTC     | AACTACAACGTAAAACCTCGAACG   |
| RBM9       | Unmethylated       | TTGATTGGTTGGGATTTTTGATT    | AAATTCCTCAAACCTCCCCAATCA   |
|            | Methylated         | GATTGGTCGGGATTTTCGATTC     | ATTCCCGAACCTCCCGATCG       |
| MAFF       | Unmethylated       | TTAGGTAGAGAATTGTGGTAGTTTT  | CCTCCACTCTAAACCACAAATCA    |
|            | Methylated         | GGTAGAGAATCGCGGTAGTTTC     | TCCGCTCTAAACCGCAAATCG      |
| RBX1       | Unmethylated       | TTAAGAGGTGTGGTTATGTGTTTT   | ACTTCAAAACACTTCTTACCCACA   |
|            | Methylated         | AAGAGGCGTGGTTACGTGTTTC     | TTCAAAACGCTTCTTACCCGCG     |
| MAPK8IP2   | Unmethylated       | TTAATTAGTGTGGTAGTGAAGTT    | TCACCTCATAACACACCCTACA     |
|            | Methylated         | ATTAGCGTTCGGTAGTGAAGTC     | ACCTCGTAACACGCCCTACG       |
| SHANK3     | Unmethylated       | GAAGGTAGGTGTTGAGTTGAGTT    | CTACTACAAATCCAAAATACCAACA  |
|            | Methylated         | AGGTAGGCGTCGAGTTGAGTC      | CTACAAATCCGAAATACCGACG     |
| LIF        | Unmethylated       | GGAGTTTGAAGTTGTTTGTGTTT    | TCCTCCTCACTCCAAACACTCA     |
|            | Methylated         | AGTTTGTAAAGTTGTTTCGTCGTC   | CTCCTCGTCCGAACACTCG        |
| TBX1       | Unmethylated       | GGGGTTTTGGGTATGTTGGTATT    | CAACAACTACAAAAATACACCA     |
|            | Methylated         | GGTTTCGGGTACGTTGGTATC      | ACAACACTACAAAAATACGCCG     |
| ADRBK2     | Unmethylated       | GAGAAGAGTAAGGTGATTTGGTT    | ACTAAAACAACAAAAACCAACCCCA  |
|            | Methylated         | GAAGAGTAAGGCGATTTTCGTC     | TAAAACGACGAAACCGACCCCG     |
| KCNJ6      | Unmethylated       | GAGTGGAGATGTTTGTGGTGAT     | AACCTAAAACCAAAAACAACCACA   |
|            | Methylated         | AGTGGAGATGTTTTCGGCGAC      | CCTAAAACCGAAACAACCGCG      |
| MGC16635   | Unmethylated       | TGGTTTGGGAGATAGAGTTTGT     | CTACAAAACACAAAAAACAAACAACA |
|            | Methylated         | GTTTCGGGAGATAGAGTTTCGTC    | ACAAAACGCGAAAAACGAACAACG   |
| OLIG2      | Unmethylated       | GTTTAGGGTTGTAGTTGGAATTTT   | ACCAAATCATCCTAATAAACACACA  |
|            | Methylated         | TTAGGGTCGTAGTCGGAATTTTC    | CAAATCGTCTAATAAACCGCG      |
| PP2447     | Unmethylated       | GAAGTGATTGAGTGTGGGTTT      | AAAATCAACCTAATCCATCCTCCA   |
|            | Methylated         | AAGTGATTGAGCGTTTCGGGTTTC   | ATCGACCTAATCCGTCCTCCG      |
| GABPA      | Unmethylated       | GGAAGTGTGTTTGGAGATAGTTTGT  | CCTAACAAAACAAAAACTAACTCA   |
|            | Methylated         | AAGCGTTTCGGAGATAGTTTGC     | CTAACGAACAAAACGCTAACTCG    |
| TIAM1      | Unmethylated       | GTTGTAGAGTGATTATGGGTGTAT   | CAATCCCACCAATACCAAACCA     |
|            | Methylated         | TGTAGAGCGATTATGGGCGTAC     | AATCCCACCGATACCGAACCG      |
| ITSN1      | Unmethylated       | TTTGGATTATGGGTGGTTGTAGT    | CCAACCTCCCAATACAAATCCA     |

|          |              |                           |                          |
|----------|--------------|---------------------------|--------------------------|
|          | Methylated   | TGGATTACGGGCGGTTGTAGC     | CGACCTCCCAATACGAATCCG    |
| CBR3     | Unmethylated | TTTTAGGTGGTTTGAAGTTTGGTTT | AAAAACACAAACTCAAACCCTCCA |
|          | Methylated   | TAGGTGGTTCTGAAGTTCTGGTTC  | AACGCGAACTCAAACCCTCCG    |
| TTC3     | Unmethylated | TTTTGGGTGGGAGTTAGTGAGT    | ACACATCCAAAAACCCAACAACA  |
|          | Methylated   | TCGGGTGGGAGTTAGCGAGC      | ACATCCGAAAACCCGACAACG    |
| ETS2     | Unmethylated | TTAGAGATTGATGAGTGTGGTGTT  | CCCTACCACTACAAACAAAACCA  |
|          | Methylated   | GAGATTGACGAGTGCGGTGTC     | CTACCGCTACGAACAAAACCG    |
| BACE2    | Unmethylated | GGAAGAGGTGTGGTTTGTAGTTT   | CAACCTAACCAATCCCATCCCA   |
|          | Methylated   | GAAGAGGCGCGGTTTGTAGTTC    | ACCTAACCGATCCCGTCCCG     |
| RIPK4    | Unmethylated | TTTTGGGTGGTTAGGTGTAGTGT   | CCTCATCAACCTATACTCCAACA  |
|          | Methylated   | TGGGCGGTTAGGTGTAGCGC      | TCATCGACCTATACTCCGACG    |
| U2AF1    | Unmethylated | GTTAGGTGAGGTGTTGTTTGTGT   | TCAAACATAACACCCCCACCA    |
|          | Methylated   | TAGGCGAGGTGTTGTTTGC       | GAACATAACGCCCCCCACCG     |
| C21orf33 | Unmethylated | GAGGGGTTGTTTTGTGGGAGTT    | CCATCAAACACCTCCACAAACA   |
|          | Methylated   | GGGGTCGTTTCTGGGAGTC       | CATCGAACGCCTCCACAAACG    |
| PFKL     | Unmethylated | TTATTGGGGTTTTGGTGTGGT     | AAAAATCCTACACCCTCAACCCA  |
|          | Methylated   | ATCGGGGTTTCTGGCGTTGGC     | AATCCTACGCCCTCGACCCG     |
| POFUT2   | Unmethylated | GGAGGTTGTGGTTGTGGTTTGT    | CAAACCTCATAACAACCTCCCA   |
|          | Methylated   | AGGTCGTGGTTGTGGTTCCGC     | AACTCTCATACGCGACTCCCG    |
| DGCR6    | Unmethylated | TAGTTATTATGGAGGGATGGGGT   | CCAACCTACATATCCCAACCA    |
|          | Methylated   | TTATTACGGAGGGACGGGGC      | AACTCACGTCATCCCGACCG     |
| PPM1F    | Unmethylated | GTGTTTTGTAAGTTGTTGTTGTT   | AAAAAACCAATCACCATCCACA   |
|          | Methylated   | GTTTCGTAAGTTGTTGTCGGTC    | AAACCGCAATCACCGTCCACG    |
| MIF      | Unmethylated | AAGTTAGGTATGTAGTTTAGTGGT  | CCACTTCAAACCCAAACCAACA   |
|          | Methylated   | GTTAGGTACGTAGTTTAGCGGC    | ACTTCGAACCCGAACCAACG     |
| TPST2    | Unmethylated | TTAGGGTATTTATTGTGGTGAGAT  | AACAAACCTCCAAAAAACTCCCA  |
|          | Methylated   | GGGTTATTTATCGTGCGGAGAC    | GAACCTCCGAAAAACTTCCCG    |
| OSBP2    | Unmethylated | GGGAGTTTGTATGGGTGTTTGT    | AAACAACCTCCAATCAACAAAACA |
|          | Methylated   | GGAGTTTGTATGGGCGTTCGC     | ACAACCTCCAATCGACGAAACG   |
| LARGE    | Unmethylated | GAGTTGGGTGGTTGTTGTAGTT    | CTACAACCTAAACAAATCCAACA  |
|          | Methylated   | AGTTGGGCGGTCGTTGTAGTC     | ACAACCTAAACGAATCCGACG    |
| CBX7     | Unmethylated | TGGTTTGGTTATTGTTGGGGT     | TACAACCTAAAAAACTACACCTCA |
|          | Methylated   | GTTCCGTTATCGGTTGGGGC      | CAACTCGAAAAACTACGCCTCG   |
| A4GALT   | Unmethylated | GGGTTTGGTGGGAGGTAGTATT    | CACTCCCTACCTATTAACCAACA  |
|          | Methylated   | GTTCCGCGGGAGGTAGTATC      | CTCCCTACCTATTAACCGACG    |
| CELSR1   | Unmethylated | GTTTTTGTATTTATTGGTGAGGTT  | CCTAAAACCACTAAAACCAACA   |
|          | Methylated   | TTTCGTATTTATTCGGCGAGGTC   | TAAAACCGCCTAAAACCGCCG    |

**Supplementary Table 2.** CpG islands from the HG17 build of the human genome predicted to be Predicted MP by PatMAN and/or SUPER-PatMAN.

| <b>HG17 CpGi Coordinates</b> | <b>PatMAN</b> | <b>SUPER-PatMAN</b> |
|------------------------------|---------------|---------------------|
| chr1:100528797-100530873     | Predicted MP  | Predicted MP        |
| chr1:10636283-10636985       | Predicted MP  | Predicted MP        |
| chr1:10687828-10689992       | Predicted MP  | Predicted MP        |
| chr1:107394371-107396745     | Predicted MP  | Predicted MP        |
| chr1:10787809-10790035       | Predicted MP  | Predicted MP        |
| chr1:10790350-10791562       | Predicted MP  | Predicted MP        |
| chr1:109307459-109308489     | Predicted MP  | Predicted MP        |
| chr1:109327802-109328704     | Predicted MP  | Predicted MP        |
| chr1:110464156-110467124     | Predicted MP  | Predicted MP        |
| chr1:1109039-1109588         | Predicted MP  | Predicted MP        |
| chr1:112243282-112245943     | Predicted MP  | Predicted MP        |
| chr1:112762922-112764722     | Predicted MP  | Predicted MP        |
| chr1:116627001-116629350     | Predicted MP  | Predicted MR        |
| chr1:11730066-11730716       | Predicted MP  | Predicted MP        |
| chr1:119260991-119263553     | Predicted MR  | Predicted MP        |
| chr1:120547664-120551733     | Predicted MP  | Predicted MP        |
| chr1:12896472-12897088       | Predicted MP  | Predicted MP        |
| chr1:1323583-1326968         | Predicted MP  | Predicted MP        |
| chr1:1329458-1331289         | Predicted MP  | Predicted MR        |
| chr1:142564304-142565342     | Predicted MP  | Predicted MP        |
| chr1:142962020-142963478     | Predicted MP  | Predicted MR        |
| chr1:146192045-146193244     | Predicted MP  | Predicted MR        |
| chr1:146388649-146390964     | Predicted MP  | Predicted MR        |
| chr1:146576984-146578182     | Predicted MP  | Predicted MR        |
| chr1:147636475-147637080     | Predicted MP  | Predicted MP        |
| chr1:148821810-148823620     | Predicted MP  | Predicted MR        |
| chr1:150367780-150368747     | Predicted MP  | Predicted MP        |
| chr1:150463767-150466058     | Predicted MP  | Predicted MP        |
| chr1:150707391-150709374     | Predicted MP  | Predicted MP        |
| chr1:151190375-151191689     | Predicted MP  | Predicted MP        |
| chr1:151286898-151289200     | Predicted MP  | Predicted MP        |
| chr1:151746834-151748137     | Predicted MP  | Predicted MR        |
| chr1:151976393-151978507     | Predicted MP  | Predicted MP        |
| chr1:153406657-153408944     | Predicted MP  | Predicted MP        |
| chr1:153828007-153829595     | Predicted MP  | Predicted MR        |
| chr1:157811829-157812559     | Predicted MP  | Predicted MP        |
| chr1:158222559-158227297     | Predicted MP  | Predicted MP        |
| chr1:158229113-158234677     | Predicted MP  | Predicted MP        |
| chr1:158236491-158242282     | Predicted MP  | Predicted MP        |
| chr1:158243904-158249468     | Predicted MP  | Predicted MP        |
| chr1:158251284-158255850     | Predicted MP  | Predicted MP        |
| chr1:15906142-15909632       | Predicted MR  | Predicted MP        |
| chr1:1594492-1596277         | Predicted MP  | Predicted MR        |
| chr1:168541593-168543089     | Predicted MP  | Predicted MP        |
| chr1:170313507-170314009     | Predicted MP  | Predicted MP        |
| chr1:170567997-170569944     | Predicted MP  | Predicted MP        |
| chr1:172907043-172908711     | Predicted MP  | Predicted MP        |
| chr1:173882274-173882905     | Predicted MP  | Predicted MR        |

|                          |              |              |
|--------------------------|--------------|--------------|
| chr1:177332445-177333760 | Predicted MP | Predicted MP |
| chr1:180171673-180174270 | Predicted MP | Predicted MP |
| chr1:185926240-185926820 | Predicted MP | Predicted MP |
| chr1:18712135-18713646   | Predicted MR | Predicted MP |
| chr1:194612175-194614150 | Predicted MR | Predicted MP |
| chr1:199507502-199509658 | Predicted MP | Predicted MP |
| chr1:201216835-201217860 | Predicted MP | Predicted MP |
| chr1:201385561-201386887 | Predicted MR | Predicted MP |
| chr1:202043970-202045604 | Predicted MP | Predicted MR |
| chr1:202156374-202158461 | Predicted MP | Predicted MR |
| chr1:20555603-20558607   | Predicted MP | Predicted MP |
| chr1:208236865-208238206 | Predicted MP | Predicted MR |
| chr1:210548978-210549857 | Predicted MP | Predicted MP |
| chr1:211112249-211114077 | Predicted MP | Predicted MP |
| chr1:2152098-2153916     | Predicted MP | Predicted MP |
| chr1:217438460-217439575 | Predicted MP | Predicted MP |
| chr1:218303615-218305499 | Predicted MP | Predicted MP |
| chr1:219908482-219910637 | Predicted MP | Predicted MR |
| chr1:220927911-220929839 | Predicted MP | Predicted MR |
| chr1:222109889-222110482 | Predicted MP | Predicted MP |
| chr1:224440956-224443274 | Predicted MP | Predicted MP |
| chr1:224900249-224901742 | Predicted MP | Predicted MP |
| chr1:225049129-225091154 | Predicted MP | Predicted MP |
| chr1:227481404-227483490 | Predicted MP | Predicted MP |
| chr1:227603149-227606759 | Predicted MP | Predicted MP |
| chr1:231815992-231818487 | Predicted MP | Predicted MP |
| chr1:231992921-231995122 | Predicted MP | Predicted MP |
| chr1:232630525-232632948 | Predicted MR | Predicted MP |
| chr1:23288428-23289749   | Predicted MP | Predicted MR |
| chr1:233530926-233532985 | Predicted MP | Predicted MP |
| chr1:23415156-23416970   | Predicted MP | Predicted MP |
| chr1:23575189-23576217   | Predicted MP | Predicted MP |
| chr1:236696863-236697666 | Predicted MP | Predicted MP |
| chr1:23759987-23761240   | Predicted MP | Predicted MP |
| chr1:23871591-23873217   | Predicted MP | Predicted MP |
| chr1:23924394-23925183   | Predicted MP | Predicted MP |
| chr1:240536833-240539349 | Predicted MP | Predicted MP |
| chr1:240940211-240941879 | Predicted MP | Predicted MP |
| chr1:243779518-243780314 | Predicted MP | Predicted MR |
| chr1:245165666-245166411 | Predicted MP | Predicted MP |
| chr1:25000409-25004720   | Predicted MP | Predicted MP |
| chr1:26705625-26708325   | Predicted MP | Predicted MR |
| chr1:27332315-27333449   | Predicted MP | Predicted MR |
| chr1:28269690-28271602   | Predicted MP | Predicted MR |
| chr1:29268066-29272487   | Predicted MP | Predicted MP |
| chr1:32072002-32073825   | Predicted MP | Predicted MP |
| chr1:32147842-32149850   | Predicted MP | Predicted MP |
| chr1:34216084-34217031   | Predicted MP | Predicted MP |
| chr1:37167356-37170100   | Predicted MP | Predicted MP |
| chr1:37942078-37943682   | Predicted MP | Predicted MP |
| chr1:39818192-39819287   | Predicted MR | Predicted MP |

|                           |              |              |
|---------------------------|--------------|--------------|
| chr1:40438274-40438998    | Predicted MP | Predicted MP |
| chr1:41516154-41518642    | Predicted MP | Predicted MR |
| chr1:45382545-45383056    | Predicted MP | Predicted MP |
| chr1:45437908-45439262    | Predicted MP | Predicted MR |
| chr1:45655958-45657195    | Predicted MP | Predicted MP |
| chr1:4624010-4627313      | Predicted MP | Predicted MP |
| chr1:47614474-47617806    | Predicted MP | Predicted MP |
| chr1:50598028-50599681    | Predicted MR | Predicted MP |
| chr1:51130254-51130754    | Predicted MP | Predicted MP |
| chr1:51145556-51147912    | Predicted MP | Predicted MP |
| chr1:52319195-52320852    | Predicted MP | Predicted MP |
| chr1:52358647-52359643    | Predicted MP | Predicted MP |
| chr1:57599757-57602837    | Predicted MP | Predicted MP |
| chr1:58959248-58963332    | Predicted MP | Predicted MP |
| chr1:61919590-61921118    | Predicted MP | Predicted MP |
| chr1:6254134-6256056      | Predicted MP | Predicted MP |
| chr1:6442658-6443684      | Predicted MP | Predicted MR |
| chr1:64592454-64592965    | Predicted MP | Predicted MP |
| chr1:6595811-6598296      | Predicted MP | Predicted MR |
| chr1:72460098-72461942    | Predicted MP | Predicted MR |
| chr1:81977935-81981194    | Predicted MP | Predicted MP |
| chr1:851016-851783        | Predicted MP | Predicted MP |
| chr1:85225099-85226784    | Predicted MP | Predicted MP |
| chr1:85436418-85437798    | Predicted MP | Predicted MP |
| chr1:86334194-86335206    | Predicted MP | Predicted MP |
| chr1:90893739-90897952    | Predicted MP | Predicted MP |
| chr1:933605-937605        | Predicted MP | Predicted MR |
| chr10:102403549-102406839 | Predicted MP | Predicted MR |
| chr10:102479041-102481195 | Predicted MP | Predicted MP |
| chr10:102491897-102492395 | Predicted MP | Predicted MR |
| chr10:102575990-102579674 | Predicted MP | Predicted MP |
| chr10:103979896-103981866 | Predicted MP | Predicted MP |
| chr10:105242903-105244602 | Predicted MP | Predicted MP |
| chr10:105604597-105606090 | Predicted MP | Predicted MP |
| chr10:1084143-1085916     | Predicted MP | Predicted MP |
| chr10:111957016-111961121 | Predicted MP | Predicted MP |
| chr10:112668032-112670281 | Predicted MP | Predicted MP |
| chr10:112825678-112829485 | Predicted MP | Predicted MP |
| chr10:114699380-114700268 | Predicted MP | Predicted MP |
| chr10:118020226-118024391 | Predicted MP | Predicted MP |
| chr10:118888834-118890725 | Predicted MP | Predicted MP |
| chr10:119285963-119288014 | Predicted MP | Predicted MP |
| chr10:119291124-119294010 | Predicted MP | Predicted MP |
| chr10:120955730-120958037 | Predicted MP | Predicted MP |
| chr10:123346311-123348604 | Predicted MP | Predicted MP |
| chr10:124883634-124887642 | Predicted MP | Predicted MP |
| chr10:124897054-124901395 | Predicted MP | Predicted MP |
| chr10:125415132-125416908 | Predicted MR | Predicted MP |
| chr10:126096390-126098154 | Predicted MP | Predicted MR |
| chr10:126837023-126841525 | Predicted MP | Predicted MP |
| chr10:128883347-128885369 | Predicted MP | Predicted MR |

|                           |              |              |
|---------------------------|--------------|--------------|
| chr10:129424009-129427365 | Predicted MP | Predicted MP |
| chr10:131655041-131656405 | Predicted MP | Predicted MP |
| chr10:134027698-134028426 | Predicted MP | Predicted MR |
| chr10:134059246-134061538 | Predicted MP | Predicted MR |
| chr10:134068005-134070000 | Predicted MP | Predicted MP |
| chr10:134435994-134436758 | Predicted MP | Predicted MP |
| chr10:134447176-134452813 | Predicted MP | Predicted MP |
| chr10:134931644-134934110 | Predicted MP | Predicted MP |
| chr10:135366521-135388293 | Predicted MP | Predicted MP |
| chr10:135411971-135413388 | Predicted MP | Predicted MR |
| chr10:21822999-21826665   | Predicted MP | Predicted MP |
| chr10:21854348-21856734   | Predicted MP | Predicted MP |
| chr10:21862457-21864738   | Predicted MP | Predicted MR |
| chr10:22580678-22582909   | Predicted MP | Predicted MP |
| chr10:22649076-22651482   | Predicted MP | Predicted MP |
| chr10:22662928-22666171   | Predicted MP | Predicted MP |
| chr10:23041837-23044127   | Predicted MP | Predicted MP |
| chr10:23672521-23673723   | Predicted MP | Predicted MP |
| chr10:2533369-2534227     | Predicted MR | Predicted MP |
| chr10:27832798-27834068   | Predicted MP | Predicted MR |
| chr10:28069904-28075510   | Predicted MP | Predicted MP |
| chr10:28327008-28328384   | Predicted MR | Predicted MP |
| chr10:29099920-29100831   | Predicted MP | Predicted MP |
| chr10:29738127-29739337   | Predicted MP | Predicted MR |
| chr10:3098325-3101787     | Predicted MP | Predicted MP |
| chr10:33662771-33666432   | Predicted MP | Predicted MP |
| chr10:34681812-34682310   | Predicted MP | Predicted MP |
| chr10:35967928-35972724   | Predicted MP | Predicted MP |
| chr10:3816587-3818514     | Predicted MP | Predicted MP |
| chr10:45258494-45259468   | Predicted MP | Predicted MR |
| chr10:45326726-45327969   | Predicted MP | Predicted MP |
| chr10:47125373-47126672   | Predicted MP | Predicted MP |
| chr10:50275000-50276902   | Predicted MR | Predicted MP |
| chr10:50487383-50490667   | Predicted MR | Predicted MP |
| chr10:59696769-59699581   | Predicted MP | Predicted MP |
| chr10:64244434-64249114   | Predicted MP | Predicted MP |
| chr10:66481629-66482129   | Predicted MP | Predicted MP |
| chr10:69313835-69315414   | Predicted MP | Predicted MP |
| chr10:69708425-69709461   | Predicted MP | Predicted MP |
| chr10:70998595-70999538   | Predicted MP | Predicted MP |
| chr10:71001361-71003657   | Predicted MP | Predicted MP |
| chr10:71007350-71008729   | Predicted MP | Predicted MP |
| chr10:71231214-71233060   | Predicted MP | Predicted MP |
| chr10:76828111-76835796   | Predicted MP | Predicted MP |
| chr10:79065961-79068652   | Predicted MP | Predicted MP |
| chr10:8130747-8134594     | Predicted MP | Predicted MP |
| chr10:81575028-81577172   | Predicted MP | Predicted MR |
| chr10:83623628-83626058   | Predicted MP | Predicted MP |
| chr10:88114726-88117642   | Predicted MP | Predicted MP |
| chr10:88204479-88205073   | Predicted MP | Predicted MP |
| chr10:89091073-89093215   | Predicted MP | Predicted MR |

|                           |              |              |
|---------------------------|--------------|--------------|
| chr10:94040327-94041619   | Predicted MP | Predicted MP |
| chr10:94724161-94725129   | Predicted MP | Predicted MP |
| chr10:98581359-98583599   | Predicted MP | Predicted MP |
| chr10:99041685-99042692   | Predicted MP | Predicted MR |
| chr10:99068434-99071254   | Predicted MP | Predicted MP |
| chr10:99779575-99781441   | Predicted MP | Predicted MR |
| chr10:99901518-99902804   | Predicted MP | Predicted MP |
| chr11:101485654-101488004 | Predicted MP | Predicted MR |
| chr11:107287783-107288760 | Predicted MP | Predicted MP |
| chr11:10785692-10787991   | Predicted MP | Predicted MP |
| chr11:110977630-110979343 | Predicted MP | Predicted MP |
| chr11:112336973-112339895 | Predicted MP | Predicted MP |
| chr11:117528240-117529774 | Predicted MP | Predicted MP |
| chr11:117810442-117813200 | Predicted MP | Predicted MR |
| chr11:119103386-119106071 | Predicted MP | Predicted MP |
| chr11:12355228-12356709   | Predicted MP | Predicted MR |
| chr11:125237436-125238321 | Predicted MP | Predicted MR |
| chr11:125437013-125438962 | Predicted MP | Predicted MP |
| chr11:128067537-128070731 | Predicted MR | Predicted MP |
| chr11:128265425-128266665 | Predicted MR | Predicted MP |
| chr11:128747476-128751782 | Predicted MP | Predicted MP |
| chr11:129376501-129378994 | Predicted MP | Predicted MP |
| chr11:131066132-131067321 | Predicted MP | Predicted MP |
| chr11:131285179-131286969 | Predicted MP | Predicted MP |
| chr11:1313914-1315894     | Predicted MP | Predicted MR |
| chr11:133905280-133905801 | Predicted MP | Predicted MR |
| chr11:134137081-134138186 | Predicted MP | Predicted MP |
| chr11:13440600-13442030   | Predicted MP | Predicted MP |
| chr11:13645881-13647746   | Predicted MP | Predicted MP |
| chr11:1549017-1551264     | Predicted MP | Predicted MP |
| chr11:1725451-1727394     | Predicted MP | Predicted MP |
| chr11:17366697-17368035   | Predicted MP | Predicted MP |
| chr11:17696873-17700111   | Predicted MP | Predicted MP |
| chr11:17712286-17715116   | Predicted MP | Predicted MP |
| chr11:19218755-19221286   | Predicted MP | Predicted MP |
| chr11:1934064-1934590     | Predicted MP | Predicted MR |
| chr11:20140805-20142201   | Predicted MR | Predicted MP |
| chr11:20574654-20576933   | Predicted MR | Predicted MP |
| chr11:2115352-2119355     | Predicted MP | Predicted MP |
| chr11:22294304-22294922   | Predicted MP | Predicted MP |
| chr11:257221-257845       | Predicted MP | Predicted MP |
| chr11:268894-271889       | Predicted MP | Predicted MP |
| chr11:30561837-30564944   | Predicted MP | Predicted MP |
| chr11:307980-309169       | Predicted MP | Predicted MR |
| chr11:32870212-32872415   | Predicted MP | Predicted MP |
| chr11:33221435-33221955   | Predicted MP | Predicted MP |
| chr11:33234888-33237045   | Predicted MP | Predicted MP |
| chr11:36354281-36356320   | Predicted MP | Predicted MP |
| chr11:4260503-4261207     | Predicted MP | Predicted MR |
| chr11:43556858-43558330   | Predicted MP | Predicted MP |
| chr11:44043826-44045104   | Predicted MP | Predicted MR |



|                           |              |              |
|---------------------------|--------------|--------------|
| chr11:46099290-46100687   | Predicted MP | Predicted MP |
| chr11:47163695-47166084   | Predicted MP | Predicted MP |
| chr11:47247261-47248917   | Predicted MP | Predicted MP |
| chr11:47870478-47871052   | Predicted MP | Predicted MP |
| chr11:57038565-57040281   | Predicted MR | Predicted MP |
| chr11:61801900-61802447   | Predicted MP | Predicted MR |
| chr11:62188499-62190419   | Predicted MP | Predicted MP |
| chr11:62447265-62448475   | Predicted MP | Predicted MP |
| chr11:63336827-63338603   | Predicted MP | Predicted MR |
| chr11:63559254-63561121   | Predicted MP | Predicted MP |
| chr11:64267674-64269645   | Predicted MP | Predicted MR |
| chr11:64785374-64786795   | Predicted MP | Predicted MP |
| chr11:65186426-65187820   | Predicted MP | Predicted MP |
| chr11:65396258-65398070   | Predicted MP | Predicted MP |
| chr11:65894757-65896674   | Predicted MP | Predicted MR |
| chr11:69340766-69343891   | Predicted MP | Predicted MP |
| chr11:70639370-70642101   | Predicted MP | Predicted MR |
| chr11:72529499-72532082   | Predicted MP | Predicted MR |
| chr11:72695708-72698369   | Predicted MP | Predicted MP |
| chr11:74950467-74951488   | Predicted MP | Predicted MP |
| chr11:75553044-75554007   | Predicted MP | Predicted MP |
| chr11:75594578-75600157   | Predicted MP | Predicted MP |
| chr11:76171396-76173598   | Predicted MP | Predicted MR |
| chr11:76861527-76863458   | Predicted MP | Predicted MP |
| chr11:78887707-78888644   | Predicted MP | Predicted MP |
| chr11:79192645-79193318   | Predicted MP | Predicted MP |
| chr11:86267293-86268114   | Predicted MP | Predicted MP |
| chr11:91596938-91600149   | Predicted MR | Predicted MP |
| chr11:9291939-9293348     | Predicted MP | Predicted MR |
| chr11:93773513-93774827   | Predicted MP | Predicted MP |
| chr11:93916249-93918805   | Predicted MP | Predicted MP |
| chr11:94461970-94463511   | Predicted MP | Predicted MR |
| chr11:9550283-9553416     | Predicted MP | Predicted MP |
| chr12:101852214-101855490 | Predicted MP | Predicted MP |
| chr12:101861058-101862044 | Predicted MP | Predicted MP |
| chr12:105034271-105036258 | Predicted MP | Predicted MR |
| chr12:107552065-107552563 | Predicted MP | Predicted MP |
| chr12:108613791-108615673 | Predicted MP | Predicted MR |
| chr12:109642452-109644639 | Predicted MP | Predicted MP |
| chr12:110497855-110500595 | Predicted MP | Predicted MP |
| chr12:111475425-111476436 | Predicted MP | Predicted MR |
| chr12:113584199-113586388 | Predicted MR | Predicted MP |
| chr12:115637692-115639242 | Predicted MP | Predicted MP |
| chr12:115779241-115780756 | Predicted MR | Predicted MP |
| chr12:119975789-119976785 | Predicted MP | Predicted MR |
| chr12:120415552-120416111 | Predicted MP | Predicted MP |
| chr12:120700364-120702271 | Predicted MP | Predicted MP |
| chr12:120703371-120706360 | Predicted MP | Predicted MP |
| chr12:121366162-121366980 | Predicted MP | Predicted MP |
| chr12:121430977-121432770 | Predicted MR | Predicted MP |
| chr12:122381156-122382047 | Predicted MP | Predicted MP |

|                           |              |              |
|---------------------------|--------------|--------------|
| chr12:122542193-122544092 | Predicted MP | Predicted MR |
| chr12:123465908-123466496 | Predicted MP | Predicted MP |
| chr12:123576077-123577716 | Predicted MP | Predicted MP |
| chr12:127275701-127278394 | Predicted MP | Predicted MP |
| chr12:12760706-12762766   | Predicted MP | Predicted MP |
| chr12:12767655-12770419   | Predicted MP | Predicted MP |
| chr12:127853901-127856576 | Predicted MP | Predicted MP |
| chr12:127862475-127864150 | Predicted MP | Predicted MR |
| chr12:130041677-130042739 | Predicted MP | Predicted MP |
| chr12:130442242-130443904 | Predicted MP | Predicted MP |
| chr12:131044955-131046347 | Predicted MP | Predicted MR |
| chr12:131578825-131579732 | Predicted MP | Predicted MP |
| chr12:131661189-131663527 | Predicted MP | Predicted MR |
| chr12:131769513-131771126 | Predicted MP | Predicted MP |
| chr12:14024515-14026795   | Predicted MR | Predicted MP |
| chr12:15832668-15834327   | Predicted MP | Predicted MP |
| chr12:1640531-1642789     | Predicted MP | Predicted MP |
| chr12:19483148-19485132   | Predicted MP | Predicted MP |
| chr12:20412532-20414616   | Predicted MP | Predicted MP |
| chr12:27917915-27918687   | Predicted MP | Predicted MP |
| chr12:29827089-29829107   | Predicted MP | Predicted MP |
| chr12:34379355-34380072   | Predicted MP | Predicted MP |
| chr12:4248223-4252838     | Predicted MP | Predicted MP |
| chr12:4253136-4255205     | Predicted MP | Predicted MP |
| chr12:43555189-43557170   | Predicted MP | Predicted MR |
| chr12:44669586-44672424   | Predicted MP | Predicted MP |
| chr12:44679855-44680456   | Predicted MP | Predicted MP |
| chr12:46385305-46386430   | Predicted MP | Predicted MP |
| chr12:47494433-47495891   | Predicted MP | Predicted MR |
| chr12:47651414-47651996   | Predicted MR | Predicted MP |
| chr12:48015640-48017728   | Predicted MP | Predicted MP |
| chr12:4888564-4891792     | Predicted MP | Predicted MP |
| chr12:50686346-50687989   | Predicted MP | Predicted MP |
| chr12:51393965-51394936   | Predicted MP | Predicted MR |
| chr12:52355692-52357821   | Predicted MP | Predicted MP |
| chr12:52430667-52432505   | Predicted MR | Predicted MP |
| chr12:52673849-52675831   | Predicted MR | Predicted MP |
| chr12:52786226-52787649   | Predicted MP | Predicted MR |
| chr12:5409743-5413542     | Predicted MP | Predicted MP |
| chr12:54653467-54653965   | Predicted MP | Predicted MR |
| chr12:56110156-56111541   | Predicted MP | Predicted MP |
| chr12:56311836-56313722   | Predicted MP | Predicted MP |
| chr12:63438925-63439968   | Predicted MP | Predicted MP |
| chr12:63504132-63505620   | Predicted MP | Predicted MP |
| chr12:70951498-70954072   | Predicted MP | Predicted MP |
| chr12:8286145-8288261     | Predicted MP | Predicted MR |
| chr12:84175650-84177227   | Predicted MR | Predicted MP |
| chr12:8439779-8441104     | Predicted MP | Predicted MR |
| chr12:8668015-8668839     | Predicted MP | Predicted MR |
| chr12:92465986-92470240   | Predicted MP | Predicted MP |
| chr12:93043890-93046808   | Predicted MP | Predicted MP |

|                           |              |              |
|---------------------------|--------------|--------------|
| chr12:94686062-94687979   | Predicted MP | Predicted MP |
| chr13:107665028-107666024 | Predicted MP | Predicted MP |
| chr13:109232142-109238396 | Predicted MP | Predicted MR |
| chr13:110162354-110166892 | Predicted MP | Predicted MP |
| chr13:110262615-110264698 | Predicted MP | Predicted MP |
| chr13:110603277-110604934 | Predicted MP | Predicted MP |
| chr13:111768215-111771701 | Predicted MP | Predicted MP |
| chr13:113286171-113288219 | Predicted MP | Predicted MP |
| chr13:113582679-113583359 | Predicted MP | Predicted MR |
| chr13:113583874-113584864 | Predicted MP | Predicted MP |
| chr13:113827188-113828503 | Predicted MP | Predicted MP |
| chr13:18145466-18146211   | Predicted MP | Predicted MR |
| chr13:19250384-19251241   | Predicted MP | Predicted MR |
| chr13:19334614-19337252   | Predicted MP | Predicted MP |
| chr13:19863147-19863861   | Predicted MP | Predicted MP |
| chr13:24217444-24220399   | Predicted MP | Predicted MP |
| chr13:24772736-24774467   | Predicted MP | Predicted MP |
| chr13:25693600-25694996   | Predicted MP | Predicted MP |
| chr13:27263417-27267670   | Predicted MP | Predicted MP |
| chr13:27438971-27439556   | Predicted MP | Predicted MP |
| chr13:27609841-27611944   | Predicted MP | Predicted MR |
| chr13:29741322-29742037   | Predicted MP | Predicted MP |
| chr13:29893287-29894981   | Predicted MP | Predicted MR |
| chr13:30145818-30146903   | Predicted MP | Predicted MP |
| chr13:31471744-31472547   | Predicted MP | Predicted MP |
| chr13:34942713-34943742   | Predicted MR | Predicted MP |
| chr13:35438684-35439421   | Predicted MP | Predicted MP |
| chr13:36391300-36393029   | Predicted MP | Predicted MR |
| chr13:41511907-41514089   | Predicted MP | Predicted MP |
| chr13:41519586-41521876   | Predicted MP | Predicted MP |
| chr13:44047625-44050537   | Predicted MP | Predicted MP |
| chr13:45634480-45635188   | Predicted MP | Predicted MP |
| chr13:48447420-48449216   | Predicted MP | Predicted MP |
| chr13:49595742-49600541   | Predicted MP | Predicted MP |
| chr13:50923393-50926282   | Predicted MP | Predicted MP |
| chr13:51551539-51552479   | Predicted MP | Predicted MP |
| chr13:69579527-69580523   | Predicted MP | Predicted MP |
| chr13:71336543-71339660   | Predicted MP | Predicted MP |
| chr13:75766972-75767470   | Predicted MP | Predicted MP |
| chr13:76798139-76799591   | Predicted MP | Predicted MP |
| chr13:87011475-87012252   | Predicted MP | Predicted MP |
| chr13:87121223-87123228   | Predicted MP | Predicted MP |
| chr13:94157454-94158137   | Predicted MP | Predicted MR |
| chr13:95539978-95542049   | Predicted MP | Predicted MP |
| chr13:97224825-97225323   | Predicted MP | Predicted MP |
| chr13:97425693-97427735   | Predicted MP | Predicted MR |
| chr13:98026046-98028155   | Predicted MP | Predicted MR |
| chr13:99418019-99422779   | Predicted MP | Predicted MP |
| chr14:102127601-102129973 | Predicted MP | Predicted MP |
| chr14:102808877-102810953 | Predicted MP | Predicted MP |
| chr14:103382652-103384757 | Predicted MP | Predicted MR |

|                           |              |              |
|---------------------------|--------------|--------------|
| chr14:103652628-103654416 | Predicted MP | Predicted MP |
| chr14:104173690-104174201 | Predicted MP | Predicted MR |
| chr14:104883745-104884442 | Predicted MP | Predicted MP |
| chr14:19750006-19750609   | Predicted MP | Predicted MP |
| chr14:20635879-20637059   | Predicted MP | Predicted MP |
| chr14:20725865-20726916   | Predicted MP | Predicted MR |
| chr14:21235496-21236263   | Predicted MP | Predicted MP |
| chr14:22903910-22905825   | Predicted MP | Predicted MP |
| chr14:28304514-28307844   | Predicted MP | Predicted MP |
| chr14:31614798-31617251   | Predicted MP | Predicted MP |
| chr14:32471426-32474364   | Predicted MP | Predicted MP |
| chr14:32477272-32479308   | Predicted MP | Predicted MP |
| chr14:34014537-34015152   | Predicted MP | Predicted MP |
| chr14:34094193-34096119   | Predicted MP | Predicted MP |
| chr14:35072032-35075072   | Predicted MP | Predicted MP |
| chr14:36055862-36058664   | Predicted MP | Predicted MP |
| chr14:36058842-36061124   | Predicted MP | Predicted MP |
| chr14:37126612-37127854   | Predicted MR | Predicted MP |
| chr14:37746716-37750904   | Predicted MR | Predicted MP |
| chr14:47212734-47215617   | Predicted MP | Predicted MP |
| chr14:53489168-53493805   | Predicted MR | Predicted MP |
| chr14:53739201-53739719   | Predicted MP | Predicted MP |
| chr14:54101285-54105110   | Predicted MP | Predicted MP |
| chr14:55654033-55656350   | Predicted MP | Predicted MP |
| chr14:56344110-56346490   | Predicted MR | Predicted MP |
| chr14:56926431-56928349   | Predicted MP | Predicted MP |
| chr14:58182685-58183678   | Predicted MP | Predicted MP |
| chr14:60183453-60186568   | Predicted MP | Predicted MP |
| chr14:60257664-60261001   | Predicted MP | Predicted MP |
| chr14:63058446-63059562   | Predicted MP | Predicted MP |
| chr14:63078918-63080693   | Predicted MP | Predicted MP |
| chr14:64001352-64002625   | Predicted MP | Predicted MP |
| chr14:64415553-64417524   | Predicted MP | Predicted MP |
| chr14:68795676-68798361   | Predicted MP | Predicted MR |
| chr14:72428706-72430824   | Predicted MP | Predicted MP |
| chr14:72773655-72775117   | Predicted MP | Predicted MP |
| chr14:74813135-74816559   | Predicted MP | Predicted MR |
| chr14:76286232-76286772   | Predicted MP | Predicted MP |
| chr14:76561431-76565351   | Predicted MP | Predicted MR |
| chr14:77034052-77035866   | Predicted MP | Predicted MP |
| chr14:77152029-77153222   | Predicted MP | Predicted MP |
| chr14:91642000-91643224   | Predicted MP | Predicted MP |
| chr14:98781318-98783174   | Predicted MP | Predicted MP |
| chr14:98809296-98811219   | Predicted MP | Predicted MR |
| chr14:99015771-99018198   | Predicted MP | Predicted MP |
| chr14:99880590-99881141   | Predicted MP | Predicted MP |
| chr15:18408458-18410372   | Predicted MP | Predicted MR |
| chr15:20046180-20048661   | Predicted MP | Predicted MP |
| chr15:20443182-20445721   | Predicted MP | Predicted MP |
| chr15:24567725-24570284   | Predicted MP | Predicted MP |
| chr15:24798483-24799975   | Predicted MP | Predicted MP |

|                         |              |              |
|-------------------------|--------------|--------------|
| chr15:26025048-26026832 | Predicted MP | Predicted MP |
| chr15:27753889-27755379 | Predicted MP | Predicted MP |
| chr15:29263978-29264478 | Predicted MP | Predicted MP |
| chr15:29404689-29408499 | Predicted MP | Predicted MP |
| chr15:30425372-30427032 | Predicted MP | Predicted MR |
| chr15:31389706-31391191 | Predicted MP | Predicted MP |
| chr15:35179525-35181853 | Predicted MP | Predicted MP |
| chr15:38550013-38551606 | Predicted MP | Predicted MP |
| chr15:39020852-39022006 | Predicted MP | Predicted MR |
| chr15:39572808-39575847 | Predicted MP | Predicted MP |
| chr15:39590399-39593264 | Predicted MP | Predicted MP |
| chr15:39700301-39701958 | Predicted MP | Predicted MR |
| chr15:41155234-41156385 | Predicted MP | Predicted MP |
| chr15:41264555-41265715 | Predicted MP | Predicted MP |
| chr15:41855806-41857185 | Predicted MP | Predicted MP |
| chr15:45796319-45798551 | Predicted MP | Predicted MP |
| chr15:48237375-48237873 | Predicted MP | Predicted MR |
| chr15:50365041-50365701 | Predicted MP | Predicted MP |
| chr15:50607492-50609310 | Predicted MP | Predicted MP |
| chr15:50883015-50884408 | Predicted MP | Predicted MP |
| chr15:54812281-54813703 | Predicted MP | Predicted MR |
| chr15:54997233-54999701 | Predicted MP | Predicted MP |
| chr15:58083162-58086146 | Predicted MP | Predicted MP |
| chr15:61121085-61123428 | Predicted MP | Predicted MP |
| chr15:62853699-62856180 | Predicted MP | Predicted MP |
| chr15:63146874-63147787 | Predicted MP | Predicted MP |
| chr15:63434478-63435789 | Predicted MP | Predicted MP |
| chr15:63948369-63950012 | Predicted MP | Predicted MR |
| chr15:65904208-65909957 | Predicted MP | Predicted MP |
| chr15:66896411-66901290 | Predicted MP | Predicted MP |
| chr15:68177732-68180595 | Predicted MR | Predicted MP |
| chr15:70308964-70311250 | Predicted MP | Predicted MP |
| chr15:70454822-70456017 | Predicted MP | Predicted MR |
| chr15:72211741-72216503 | Predicted MR | Predicted MP |
| chr15:72807737-72808489 | Predicted MP | Predicted MP |
| chr15:73038039-73039275 | Predicted MP | Predicted MP |
| chr15:73532352-73535841 | Predicted MP | Predicted MP |
| chr15:73726245-73728175 | Predicted MP | Predicted MP |
| chr15:76699294-76700991 | Predicted MP | Predicted MR |
| chr15:77168613-77171838 | Predicted MP | Predicted MP |
| chr15:78138433-78139952 | Predicted MP | Predicted MP |
| chr15:79079548-79082939 | Predicted MP | Predicted MP |
| chr15:80122235-80127493 | Predicted MP | Predicted MP |
| chr15:80584287-80585778 | Predicted MP | Predicted MR |
| chr15:80978865-80980356 | Predicted MP | Predicted MR |
| chr15:82688783-82690265 | Predicted MP | Predicted MP |
| chr15:83091858-83093651 | Predicted MP | Predicted MP |
| chr15:83577883-83579371 | Predicted MP | Predicted MP |
| chr15:87146790-87148273 | Predicted MP | Predicted MP |
| chr15:87711378-87712870 | Predicted MR | Predicted MP |
| chr15:88321770-88322402 | Predicted MP | Predicted MP |

|                         |              |              |
|-------------------------|--------------|--------------|
| chr15:91078007-91078755 | Predicted MP | Predicted MR |
| chr15:94674147-94678940 | Predicted MP | Predicted MP |
| chr15:97007694-97011937 | Predicted MP | Predicted MR |
| chr15:97462127-97464362 | Predicted MP | Predicted MP |
| chr15:98283729-98286726 | Predicted MP | Predicted MP |
| chr15:99236422-99238924 | Predicted MP | Predicted MP |
| chr16:1009096-1010254   | Predicted MP | Predicted MP |
| chr16:11255845-11258324 | Predicted MP | Predicted MP |
| chr16:1198873-1199715   | Predicted MP | Predicted MP |
| chr16:12262250-12263650 | Predicted MP | Predicted MP |
| chr16:14303009-14304860 | Predicted MP | Predicted MP |
| chr16:14929715-14930553 | Predicted MP | Predicted MR |
| chr16:16328187-16328959 | Predicted MP | Predicted MR |
| chr16:173847-174349     | Predicted MP | Predicted MP |
| chr16:220371-221346     | Predicted MP | Predicted MR |
| chr16:2463362-2465814   | Predicted MP | Predicted MR |
| chr16:27028084-27029267 | Predicted MP | Predicted MP |
| chr16:29513322-29514773 | Predicted MP | Predicted MR |
| chr16:2958315-2960312   | Predicted MP | Predicted MR |
| chr16:2969679-2971818   | Predicted MP | Predicted MR |
| chr16:29723673-29727156 | Predicted MP | Predicted MP |
| chr16:29818616-29819780 | Predicted MP | Predicted MP |
| chr16:30087314-30087812 | Predicted MP | Predicted MP |
| chr16:30101635-30103060 | Predicted MP | Predicted MP |
| chr16:30576254-30579024 | Predicted MP | Predicted MP |
| chr16:31026728-31028626 | Predicted MP | Predicted MP |
| chr16:31087951-31088540 | Predicted MP | Predicted MP |
| chr16:3224905-3225746   | Predicted MP | Predicted MP |
| chr16:34152857-34153896 | Predicted MP | Predicted MP |
| chr16:3967263-3967763   | Predicted MP | Predicted MP |
| chr16:4104607-4107286   | Predicted MP | Predicted MP |
| chr16:414453-417173     | Predicted MP | Predicted MP |
| chr16:46975629-46977673 | Predicted MP | Predicted MP |
| chr16:48445908-48451023 | Predicted MP | Predicted MP |
| chr16:49138652-49140848 | Predicted MP | Predicted MR |
| chr16:49332769-49334512 | Predicted MP | Predicted MR |
| chr16:49740775-49745368 | Predicted MP | Predicted MP |
| chr16:52879847-52883414 | Predicted MP | Predicted MP |
| chr16:534237-535295     | Predicted MP | Predicted MP |
| chr16:53519503-53525441 | Predicted MP | Predicted MP |
| chr16:53527436-53530801 | Predicted MP | Predicted MP |
| chr16:53914999-53916677 | Predicted MP | Predicted MP |
| chr16:56591346-56592700 | Predicted MP | Predicted MP |
| chr16:56615761-56619118 | Predicted MP | Predicted MP |
| chr16:622539-624266     | Predicted MP | Predicted MR |
| chr16:63711887-63715487 | Predicted MP | Predicted MP |
| chr16:65745861-65747507 | Predicted MP | Predicted MP |
| chr16:66152963-66155389 | Predicted MP | Predicted MR |
| chr16:67722989-67724706 | Predicted MP | Predicted MR |
| chr16:68156654-68158600 | Predicted MP | Predicted MP |
| chr16:71648716-71650738 | Predicted MP | Predicted MP |

|                         |              |              |
|-------------------------|--------------|--------------|
| chr16:79394630-79396464 | Predicted MP | Predicted MP |
| chr16:79523081-79524419 | Predicted MP | Predicted MP |
| chr16:84143075-84148258 | Predicted MP | Predicted MP |
| chr16:84203717-84206131 | Predicted MP | Predicted MR |
| chr16:85087430-85090676 | Predicted MP | Predicted MP |
| chr16:85157618-85160378 | Predicted MP | Predicted MP |
| chr16:85973571-85976231 | Predicted MP | Predicted MP |
| chr16:87023695-87025303 | Predicted MP | Predicted MR |
| chr16:87348931-87349454 | Predicted MP | Predicted MR |
| chr16:87533772-87536458 | Predicted MP | Predicted MR |
| chr16:87872748-87876740 | Predicted MP | Predicted MP |
| chr16:87983400-87984522 | Predicted MP | Predicted MP |
| chr16:88082882-88085534 | Predicted MP | Predicted MP |
| chr16:88241162-88242678 | Predicted MP | Predicted MP |
| chr16:88516201-88517922 | Predicted MP | Predicted MR |
| chr16:9091410-9094501   | Predicted MP | Predicted MP |
| chr17:14144746-14148735 | Predicted MP | Predicted MP |
| chr17:15938719-15939435 | Predicted MP | Predicted MP |
| chr17:17653553-17655339 | Predicted MP | Predicted MP |
| chr17:17962616-17965776 | Predicted MP | Predicted MP |
| chr17:18907083-18908147 | Predicted MP | Predicted MR |
| chr17:18932168-18933916 | Predicted MP | Predicted MR |
| chr17:19033074-19034123 | Predicted MP | Predicted MR |
| chr17:1903312-1909412   | Predicted MP | Predicted MP |
| chr17:19058202-19059953 | Predicted MP | Predicted MR |
| chr17:19794563-19795061 | Predicted MP | Predicted MR |
| chr17:20400787-20401552 | Predicted MP | Predicted MR |
| chr17:20885446-20887929 | Predicted MP | Predicted MR |
| chr17:2242230-2244615   | Predicted MP | Predicted MP |
| chr17:2248570-2252756   | Predicted MP | Predicted MP |
| chr17:23809405-23810386 | Predicted MP | Predicted MP |
| chr17:24061885-24063678 | Predicted MP | Predicted MR |
| chr17:2540977-2542957   | Predicted MP | Predicted MR |
| chr17:25874060-25874661 | Predicted MP | Predicted MP |
| chr17:26909569-26911835 | Predicted MP | Predicted MP |
| chr17:29929956-29933426 | Predicted MP | Predicted MP |
| chr17:30312039-30313364 | Predicted MP | Predicted MP |
| chr17:30938154-30939142 | Predicted MP | Predicted MP |
| chr17:31974087-31976125 | Predicted MP | Predicted MR |
| chr17:32239032-32240385 | Predicted MP | Predicted MP |
| chr17:32370179-32372574 | Predicted MR | Predicted MP |
| chr17:3314424-3314925   | Predicted MP | Predicted MP |
| chr17:33175912-33179070 | Predicted MR | Predicted MP |
| chr17:34040063-34040644 | Predicted MP | Predicted MR |
| chr17:34111453-34116046 | Predicted MP | Predicted MP |
| chr17:34157028-34159969 | Predicted MP | Predicted MP |
| chr17:34742995-34743922 | Predicted MP | Predicted MP |
| chr17:34810571-34812729 | Predicted MP | Predicted MP |
| chr17:35027188-35028587 | Predicted MP | Predicted MP |
| chr17:35531010-35533305 | Predicted MP | Predicted MP |
| chr17:38884453-38884951 | Predicted MP | Predicted MP |

|                         |              |              |
|-------------------------|--------------|--------------|
| chr17:39153070-39154278 | Predicted MP | Predicted MP |
| chr17:39651093-39655397 | Predicted MP | Predicted MP |
| chr17:39989773-39992479 | Predicted MP | Predicted MP |
| chr17:402840-403378     | Predicted MP | Predicted MP |
| chr17:40553482-40554585 | Predicted MP | Predicted MR |
| chr17:40580380-40582028 | Predicted MP | Predicted MR |
| chr17:40865014-40866361 | Predicted MP | Predicted MP |
| chr17:41017-42789       | Predicted MP | Predicted MP |
| chr17:41017524-41019838 | Predicted MP | Predicted MP |
| chr17:41326980-41331030 | Predicted MP | Predicted MP |
| chr17:41625551-41627602 | Predicted MP | Predicted MP |
| chr17:41676420-41678057 | Predicted MP | Predicted MR |
| chr17:421648-422720     | Predicted MP | Predicted MP |
| chr17:43081370-43083336 | Predicted MP | Predicted MP |
| chr17:43125767-43127963 | Predicted MP | Predicted MP |
| chr17:43975200-43977464 | Predicted MP | Predicted MP |
| chr17:44078503-44079833 | Predicted MP | Predicted MP |
| chr17:44427669-44431423 | Predicted MP | Predicted MP |
| chr17:44656301-44657749 | Predicted MP | Predicted MP |
| chr17:44927166-44930551 | Predicted MP | Predicted MP |
| chr17:45195609-45196590 | Predicted MP | Predicted MR |
| chr17:45581211-45583861 | Predicted MP | Predicted MR |
| chr17:46297521-46300000 | Predicted MP | Predicted MP |
| chr17:4791576-4794781   | Predicted MP | Predicted MR |
| chr17:50853125-50854896 | Predicted MP | Predicted MP |
| chr17:52687975-52689737 | Predicted MP | Predicted MR |
| chr17:54187698-54189475 | Predicted MP | Predicted MR |
| chr17:56827581-56833553 | Predicted MP | Predicted MP |
| chr17:56888304-56889818 | Predicted MP | Predicted MP |
| chr17:58058045-58059950 | Predicted MP | Predicted MP |
| chr17:581637-583605     | Predicted MP | Predicted MP |
| chr17:58886916-58887672 | Predicted MP | Predicted MP |
| chr17:58907381-58909033 | Predicted MP | Predicted MP |
| chr17:59931690-59934157 | Predicted MP | Predicted MP |
| chr17:60206659-60208528 | Predicted MP | Predicted MP |
| chr17:63251275-63253248 | Predicted MP | Predicted MP |
| chr17:63712522-63714217 | Predicted MP | Predicted MP |
| chr17:67627514-67632301 | Predicted MP | Predicted MP |
| chr17:69938257-69940781 | Predicted MP | Predicted MP |
| chr17:70255373-70257603 | Predicted MP | Predicted MR |
| chr17:70350268-70351517 | Predicted MP | Predicted MR |
| chr17:70489503-70490568 | Predicted MP | Predicted MR |
| chr17:70661017-70662683 | Predicted MP | Predicted MR |
| chr17:7094863-7097135   | Predicted MP | Predicted MP |
| chr17:7104747-7107123   | Predicted MP | Predicted MP |
| chr17:71403391-71405289 | Predicted MP | Predicted MP |
| chr17:71890226-71894184 | Predicted MP | Predicted MP |
| chr17:7193967-7196756   | Predicted MP | Predicted MP |
| chr17:72044723-72046387 | Predicted MP | Predicted MR |
| chr17:72233332-72235292 | Predicted MP | Predicted MP |
| chr17:72647024-72649606 | Predicted MP | Predicted MR |



|                         |              |              |
|-------------------------|--------------|--------------|
| chr17:73849087-73850305 | Predicted MP | Predicted MR |
| chr17:73860165-73861261 | Predicted MP | Predicted MR |
| chr17:74432158-74433771 | Predicted MP | Predicted MR |
| chr17:7458108-7459761   | Predicted MP | Predicted MP |
| chr17:75335632-75337386 | Predicted MP | Predicted MP |
| chr17:75379547-75382300 | Predicted MR | Predicted MP |
| chr17:75384722-75387952 | Predicted MP | Predicted MP |
| chr17:75420444-75423688 | Predicted MP | Predicted MP |
| chr17:75426621-75430399 | Predicted MP | Predicted MP |
| chr17:75943590-75944426 | Predicted MP | Predicted MP |
| chr17:76484434-76485321 | Predicted MP | Predicted MP |
| chr17:76622595-76624705 | Predicted MP | Predicted MP |
| chr17:76810837-76812323 | Predicted MP | Predicted MP |
| chr17:7685322-7689247   | Predicted MP | Predicted MP |
| chr17:76929150-76933097 | Predicted MP | Predicted MP |
| chr17:77092279-77097210 | Predicted MP | Predicted MP |
| chr17:77194978-77195967 | Predicted MP | Predicted MP |
| chr17:7728436-7730046   | Predicted MP | Predicted MP |
| chr17:77477754-77479874 | Predicted MP | Predicted MP |
| chr17:77648330-77650837 | Predicted MP | Predicted MR |
| chr17:7773111-7774107   | Predicted MP | Predicted MR |
| chr17:78399840-78400548 | Predicted MP | Predicted MP |
| chr17:78629656-78632857 | Predicted MP | Predicted MR |
| chr17:7964646-7968001   | Predicted MR | Predicted MP |
| chr17:8006303-8007541   | Predicted MP | Predicted MR |
| chr17:8846591-8849008   | Predicted MP | Predicted MP |
| chr17:8864759-8868041   | Predicted MP | Predicted MP |
| chr17:958575-959941     | Predicted MP | Predicted MP |
| chr18:12691834-12693514 | Predicted MP | Predicted MP |
| chr18:12872996-12874867 | Predicted MP | Predicted MR |
| chr18:13858454-13859450 | Predicted MP | Predicted MR |
| chr18:18002355-18006695 | Predicted MP | Predicted MP |
| chr18:19522929-19524802 | Predicted MP | Predicted MP |
| chr18:26934926-26936764 | Predicted MP | Predicted MP |
| chr18:27925488-27927620 | Predicted MP | Predicted MP |
| chr18:28604643-28606672 | Predicted MP | Predicted MP |
| chr18:29992751-29993840 | Predicted MP | Predicted MP |
| chr18:30056050-30057923 | Predicted MP | Predicted MP |
| chr18:33398602-33402044 | Predicted MP | Predicted MP |
| chr18:3439049-3442636   | Predicted MP | Predicted MP |
| chr18:42589774-42592281 | Predicted MP | Predicted MP |
| chr18:42750600-42752156 | Predicted MP | Predicted MR |
| chr18:43026644-43029789 | Predicted MP | Predicted MP |
| chr18:44188185-44191446 | Predicted MP | Predicted MP |
| chr18:4443593-4446008   | Predicted MP | Predicted MP |
| chr18:44730026-44733721 | Predicted MP | Predicted MR |
| chr18:44755283-44757391 | Predicted MP | Predicted MP |
| chr18:45340822-45342797 | Predicted MP | Predicted MP |
| chr18:48120954-48121490 | Predicted MP | Predicted MP |
| chr18:53170280-53172825 | Predicted MP | Predicted MR |
| chr18:53861714-53863694 | Predicted MP | Predicted MP |

|                         |              |              |
|-------------------------|--------------|--------------|
| chr18:5618017-5621185   | Predicted MP | Predicted MP |
| chr18:57711108-57713116 | Predicted MP | Predicted MP |
| chr18:58532915-58535696 | Predicted MP | Predicted MR |
| chr18:66106398-66108390 | Predicted MP | Predicted MR |
| chr18:68359623-68363040 | Predicted MP | Predicted MP |
| chr18:68684730-68688380 | Predicted MP | Predicted MP |
| chr18:7106623-7108496   | Predicted MP | Predicted MP |
| chr18:72334886-72337818 | Predicted MP | Predicted MR |
| chr18:74839157-74842685 | Predicted MP | Predicted MP |
| chr18:75254052-75259280 | Predicted MP | Predicted MP |
| chr18:895965-899808     | Predicted MP | Predicted MP |
| chr18:9603497-9605521   | Predicted MP | Predicted MP |
| chr19:10165830-10167126 | Predicted MP | Predicted MP |
| chr19:1124309-1125734   | Predicted MP | Predicted MR |
| chr19:1199073-1202249   | Predicted MP | Predicted MR |
| chr19:1238399-1238903   | Predicted MP | Predicted MR |
| chr19:12762769-12766043 | Predicted MP | Predicted MR |
| chr19:12805263-12806467 | Predicted MP | Predicted MR |
| chr19:12909811-12911241 | Predicted MP | Predicted MP |
| chr19:12982750-12985527 | Predicted MP | Predicted MP |
| chr19:13069146-13071797 | Predicted MP | Predicted MP |
| chr19:13121170-13122633 | Predicted MP | Predicted MP |
| chr19:13122727-13126371 | Predicted MP | Predicted MP |
| chr19:13836337-13838242 | Predicted MP | Predicted MR |
| chr19:13934206-13936201 | Predicted MP | Predicted MP |
| chr19:1400655-1401689   | Predicted MP | Predicted MP |
| chr19:1415895-1422322   | Predicted MP | Predicted MP |
| chr19:14403468-14405879 | Predicted MP | Predicted MR |
| chr19:1517795-1519924   | Predicted MP | Predicted MR |
| chr19:1542651-1544562   | Predicted MP | Predicted MP |
| chr19:1555583-1557102   | Predicted MP | Predicted MP |
| chr19:1703986-1706916   | Predicted MP | Predicted MP |
| chr19:1813077-1816186   | Predicted MP | Predicted MP |
| chr19:18514502-18515728 | Predicted MP | Predicted MP |
| chr19:18758838-18763556 | Predicted MP | Predicted MP |
| chr19:21437721-21438715 | Predicted MP | Predicted MR |
| chr19:22079242-22079745 | Predicted MP | Predicted MP |
| chr19:241420-243383     | Predicted MP | Predicted MR |
| chr19:2444654-2446395   | Predicted MP | Predicted MP |
| chr19:2667925-2669183   | Predicted MP | Predicted MR |
| chr19:2877196-2878247   | Predicted MP | Predicted MP |
| chr19:2997879-2998693   | Predicted MP | Predicted MR |
| chr19:3309389-3312378   | Predicted MP | Predicted MR |
| chr19:3413665-3414623   | Predicted MP | Predicted MR |
| chr19:34707553-34710651 | Predicted MP | Predicted MP |
| chr19:35557154-35558827 | Predicted MP | Predicted MP |
| chr19:3588201-3588740   | Predicted MP | Predicted MR |
| chr19:36531125-36535168 | Predicted MP | Predicted MP |
| chr19:382020-385276     | Predicted MP | Predicted MP |
| chr19:3831431-3832455   | Predicted MP | Predicted MR |
| chr19:3888300-3889061   | Predicted MP | Predicted MP |

|                         |              |              |
|-------------------------|--------------|--------------|
| chr19:38977796-38981676 | Predicted MP | Predicted MP |
| chr19:39087991-39090294 | Predicted MP | Predicted MR |
| chr19:3988198-3989889   | Predicted MP | Predicted MP |
| chr19:4015775-4019213   | Predicted MP | Predicted MP |
| chr19:40212740-40214440 | Predicted MP | Predicted MP |
| chr19:40449780-40452886 | Predicted MP | Predicted MP |
| chr19:43410820-43412701 | Predicted MP | Predicted MP |
| chr19:43517700-43519785 | Predicted MP | Predicted MP |
| chr19:44689098-44690527 | Predicted MP | Predicted MP |
| chr19:447638-449290     | Predicted MP | Predicted MR |
| chr19:45388255-45390351 | Predicted MP | Predicted MP |
| chr19:45640534-45642979 | Predicted MP | Predicted MR |
| chr19:46561194-46562311 | Predicted MP | Predicted MP |
| chr19:47110741-47111641 | Predicted MP | Predicted MP |
| chr19:47135731-47137382 | Predicted MP | Predicted MR |
| chr19:47449410-47451664 | Predicted MP | Predicted MP |
| chr19:4782358-4783232   | Predicted MP | Predicted MR |
| chr19:5047427-5048125   | Predicted MP | Predicted MP |
| chr19:50842712-50843411 | Predicted MP | Predicted MP |
| chr19:52306882-52309019 | Predicted MP | Predicted MP |
| chr19:52802736-52805588 | Predicted MP | Predicted MR |
| chr19:54556892-54557719 | Predicted MP | Predicted MR |
| chr19:54785242-54787397 | Predicted MP | Predicted MR |
| chr19:54791788-54793528 | Predicted MP | Predicted MP |
| chr19:54846119-54848186 | Predicted MP | Predicted MP |
| chr19:54870523-54873009 | Predicted MP | Predicted MP |
| chr19:54961168-54962723 | Predicted MP | Predicted MP |
| chr19:55045249-55047522 | Predicted MP | Predicted MR |
| chr19:55456054-55456582 | Predicted MP | Predicted MR |
| chr19:55693480-55695404 | Predicted MP | Predicted MP |
| chr19:55889496-55890898 | Predicted MP | Predicted MP |
| chr19:56213391-56214355 | Predicted MP | Predicted MR |
| chr19:570484-572974     | Predicted MP | Predicted MP |
| chr19:59104045-59105254 | Predicted MP | Predicted MP |
| chr19:59172913-59174025 | Predicted MR | Predicted MP |
| chr19:602187-603279     | Predicted MP | Predicted MP |
| chr19:60654101-60656361 | Predicted MP | Predicted MR |
| chr19:60845523-60847395 | Predicted MP | Predicted MR |
| chr19:61323451-61325185 | Predicted MP | Predicted MP |
| chr19:6180394-6180948   | Predicted MP | Predicted MR |
| chr19:62866992-62868208 | Predicted MP | Predicted MP |
| chr19:63357623-63359076 | Predicted MP | Predicted MP |
| chr19:63775639-63777272 | Predicted MP | Predicted MP |
| chr19:7582904-7584143   | Predicted MP | Predicted MR |
| chr19:7599886-7600880   | Predicted MP | Predicted MR |
| chr19:7832567-7834952   | Predicted MP | Predicted MP |
| chr19:794435-795818     | Predicted MP | Predicted MR |
| chr19:8119649-8120939   | Predicted MP | Predicted MR |
| chr19:8580442-8582115   | Predicted MP | Predicted MP |
| chr19:9406659-9407557   | Predicted MP | Predicted MP |
| chr19:9763105-9765356   | Predicted MP | Predicted MP |

|                          |              |              |
|--------------------------|--------------|--------------|
| chr19:9907593-9908650    | Predicted MP | Predicted MP |
| chr2:104927048-104932564 | Predicted MR | Predicted MP |
| chr2:105325598-105326265 | Predicted MP | Predicted MP |
| chr2:110101479-110103552 | Predicted MP | Predicted MP |
| chr2:110498739-110499319 | Predicted MP | Predicted MR |
| chr2:114363251-114364908 | Predicted MP | Predicted MP |
| chr2:116057-116873       | Predicted MP | Predicted MP |
| chr2:118486737-118488645 | Predicted MR | Predicted MP |
| chr2:119318560-119322231 | Predicted MP | Predicted MP |
| chr2:119630293-119633278 | Predicted MP | Predicted MP |
| chr2:120233003-120234550 | Predicted MP | Predicted MR |
| chr2:120817201-120821303 | Predicted MP | Predicted MP |
| chr2:128358727-128360849 | Predicted MP | Predicted MP |
| chr2:132082947-132085162 | Predicted MP | Predicted MP |
| chr2:136466954-136468142 | Predicted MP | Predicted MP |
| chr2:145106858-145109345 | Predicted MP | Predicted MP |
| chr2:14724354-14726518   | Predicted MP | Predicted MP |
| chr2:152779803-152781721 | Predicted MP | Predicted MP |
| chr2:153398942-153401332 | Predicted MP | Predicted MP |
| chr2:158557374-158559154 | Predicted MP | Predicted MP |
| chr2:161919505-161921988 | Predicted MP | Predicted MP |
| chr2:162105058-162106746 | Predicted MP | Predicted MP |
| chr2:164417806-164419129 | Predicted MP | Predicted MP |
| chr2:1716707-1719455     | Predicted MP | Predicted MP |
| chr2:172581390-172582308 | Predicted MP | Predicted MP |
| chr2:172774613-172778138 | Predicted MP | Predicted MP |
| chr2:172789971-172793696 | Predicted MR | Predicted MP |
| chr2:174653521-174656258 | Predicted MP | Predicted MR |
| chr2:176769403-176771713 | Predicted MP | Predicted MP |
| chr2:176796733-176799808 | Predicted MP | Predicted MR |
| chr2:176864794-176865499 | Predicted MP | Predicted MP |
| chr2:17980522-17982668   | Predicted MP | Predicted MP |
| chr2:181670019-181671832 | Predicted MP | Predicted MP |
| chr2:191097809-191099539 | Predicted MP | Predicted MR |
| chr2:192367691-192369464 | Predicted MP | Predicted MR |
| chr2:193583544-193584383 | Predicted MP | Predicted MR |
| chr2:197616003-197617656 | Predicted MP | Predicted MR |
| chr2:200145708-200150544 | Predicted MP | Predicted MP |
| chr2:200158810-200160067 | Predicted MP | Predicted MP |
| chr2:200864667-200865417 | Predicted MP | Predicted MP |
| chr2:201732345-201732917 | Predicted MP | Predicted MP |
| chr2:20471309-20473007   | Predicted MP | Predicted MP |
| chr2:207856108-207857661 | Predicted MP | Predicted MP |
| chr2:208219076-208221300 | Predicted MP | Predicted MP |
| chr2:208314727-208317779 | Predicted MP | Predicted MP |
| chr2:208456829-208461643 | Predicted MP | Predicted MP |
| chr2:217061234-217063017 | Predicted MP | Predicted MP |
| chr2:219088267-219091140 | Predicted MP | Predicted MP |
| chr2:219750011-219751917 | Predicted MP | Predicted MP |
| chr2:220186652-220189151 | Predicted MP | Predicted MP |
| chr2:222260557-222264525 | Predicted MP | Predicted MP |

|                           |              |              |
|---------------------------|--------------|--------------|
| chr2:223008247-223011183  | Predicted MP | Predicted MP |
| chr2:226272120-226273281  | Predicted MP | Predicted MR |
| chr2:227487450-227490694  | Predicted MP | Predicted MR |
| chr2:227853886-227855584  | Predicted MP | Predicted MR |
| chr2:23518980-23522051    | Predicted MP | Predicted MP |
| chr2:236856448-236860925  | Predicted MP | Predicted MP |
| chr2:240057784-240060325  | Predicted MP | Predicted MR |
| chr2:240684155-240685736  | Predicted MP | Predicted MP |
| chr2:240701169-240702430  | Predicted MP | Predicted MP |
| chr2:2411111714-241113784 | Predicted MP | Predicted MP |
| chr2:241478039-241480729  | Predicted MP | Predicted MP |
| chr2:241868317-241869131  | Predicted MP | Predicted MR |
| chr2:241931084-241932815  | Predicted MP | Predicted MR |
| chr2:241973958-241976181  | Predicted MP | Predicted MR |
| chr2:24257344-24258827    | Predicted MP | Predicted MR |
| chr2:24309049-24310397    | Predicted MP | Predicted MR |
| chr2:25105563-25107139    | Predicted MP | Predicted MR |
| chr2:25767560-25768751    | Predicted MP | Predicted MP |
| chr2:25807111-25808929    | Predicted MP | Predicted MP |
| chr2:25839726-25840617    | Predicted MP | Predicted MR |
| chr2:26306271-26308904    | Predicted MP | Predicted MP |
| chr2:26981699-26984991    | Predicted MP | Predicted MP |
| chr2:277161-280415        | Predicted MP | Predicted MP |
| chr2:296317-299241        | Predicted MP | Predicted MP |
| chr2:36493700-36496742    | Predicted MP | Predicted MR |
| chr2:37809637-37811892    | Predicted MP | Predicted MP |
| chr2:38514953-38516726    | Predicted MP | Predicted MR |
| chr2:38740533-38742521    | Predicted MP | Predicted MP |
| chr2:42185733-42187900    | Predicted MP | Predicted MR |
| chr2:42239729-42241644    | Predicted MP | Predicted MP |
| chr2:43435535-43436078    | Predicted MP | Predicted MP |
| chr2:45090720-45092287    | Predicted MR | Predicted MP |
| chr2:45142621-45144503    | Predicted MP | Predicted MP |
| chr2:47708162-47711225    | Predicted MP | Predicted MP |
| chr2:48043706-48045940    | Predicted MP | Predicted MP |
| chr2:5010627-5011125      | Predicted MP | Predicted MR |
| chr2:53925135-53926533    | Predicted MP | Predicted MP |
| chr2:54253977-54255021    | Predicted MP | Predicted MP |
| chr2:54837306-54838279    | Predicted MP | Predicted MR |
| chr2:55788929-55789850    | Predicted MP | Predicted MP |
| chr2:56322313-56324091    | Predicted MP | Predicted MP |
| chr2:5781529-5785014      | Predicted MP | Predicted MP |
| chr2:60692172-60694586    | Predicted MP | Predicted MP |
| chr2:61536941-61537461    | Predicted MR | Predicted MP |
| chr2:62333510-62336369    | Predicted MP | Predicted MP |
| chr2:63979150-63980935    | Predicted MP | Predicted MP |
| chr2:65365920-65367387    | Predicted MP | Predicted MP |
| chr2:70224807-70227480    | Predicted MP | Predicted MP |
| chr2:70262654-70264547    | Predicted MP | Predicted MP |
| chr2:72281588-72284698    | Predicted MP | Predicted MP |
| chr2:72284906-72289311    | Predicted MP | Predicted MP |

|                         |              |              |
|-------------------------|--------------|--------------|
| chr2:73062603-73063731  | Predicted MR | Predicted MP |
| chr2:73208932-73211143  | Predicted MP | Predicted MP |
| chr2:73340780-73342769  | Predicted MR | Predicted MP |
| chr2:73524035-73525563  | Predicted MP | Predicted MP |
| chr2:74651939-74655787  | Predicted MP | Predicted MP |
| chr2:79650982-79652161  | Predicted MP | Predicted MR |
| chr2:84597497-84598596  | Predicted MP | Predicted MP |
| chr2:85271262-85274424  | Predicted MP | Predicted MP |
| chr2:85891772-85894247  | Predicted MR | Predicted MP |
| chr2:89059334-89059842  | Predicted MP | Predicted MP |
| chr2:91091063-91093632  | Predicted MP | Predicted MR |
| chr2:91418668-91420571  | Predicted MP | Predicted MR |
| chr2:95246564-95248024  | Predicted MP | Predicted MP |
| chr2:95294469-95295662  | Predicted MP | Predicted MP |
| chr2:96202996-96205234  | Predicted MR | Predicted MP |
| chr2:96408561-96410010  | Predicted MP | Predicted MP |
| chr2:96902997-96905427  | Predicted MP | Predicted MR |
| chr2:9720546-9722405    | Predicted MP | Predicted MP |
| chr2:97720458-97721941  | Predicted MP | Predicted MP |
| chr2:99563907-99565863  | Predicted MP | Predicted MP |
| chr20:10145792-10148687 | Predicted MP | Predicted MP |
| chr20:10600519-10603903 | Predicted MP | Predicted MP |
| chr20:13923480-13925275 | Predicted MP | Predicted MP |
| chr20:17497506-17499662 | Predicted MP | Predicted MP |
| chr20:17707093-17708089 | Predicted MP | Predicted MP |
| chr20:17984569-17986990 | Predicted MP | Predicted MP |
| chr20:18122665-18123310 | Predicted MP | Predicted MP |
| chr20:20292048-20294324 | Predicted MP | Predicted MP |
| chr20:20295183-20298949 | Predicted MP | Predicted MP |
| chr20:21034000-21035463 | Predicted MP | Predicted MP |
| chr20:21443918-21444925 | Predicted MP | Predicted MP |
| chr20:21633811-21635996 | Predicted MP | Predicted MP |
| chr20:22505159-22508275 | Predicted MP | Predicted MP |
| chr20:22510471-22516155 | Predicted MP | Predicted MP |
| chr20:225668-227408     | Predicted MP | Predicted MP |
| chr20:23293700-23294859 | Predicted MP | Predicted MP |
| chr20:24397521-24400289 | Predicted MP | Predicted MP |
| chr20:2452956-2454366   | Predicted MP | Predicted MP |
| chr20:25241044-25241782 | Predicted MP | Predicted MP |
| chr20:252612-255977     | Predicted MP | Predicted MP |
| chr20:2620512-2622921   | Predicted MP | Predicted MP |
| chr20:28164599-28165661 | Predicted MP | Predicted MR |
| chr20:2999993-3001397   | Predicted MP | Predicted MP |
| chr20:30019174-30020439 | Predicted MP | Predicted MR |
| chr20:30533649-30536673 | Predicted MP | Predicted MP |
| chr20:30634203-30637487 | Predicted MP | Predicted MP |
| chr20:31166551-31167258 | Predicted MP | Predicted MP |
| chr20:31761139-31762011 | Predicted MP | Predicted MP |
| chr20:35073557-35074556 | Predicted MP | Predicted MP |
| chr20:3601001-3602967   | Predicted MP | Predicted MP |
| chr20:39090192-39092080 | Predicted MP | Predicted MP |

|                         |              |              |
|-------------------------|--------------|--------------|
| chr20:41976242-41978705 | Predicted MP | Predicted MP |
| chr20:42807411-42808681 | Predicted MP | Predicted MP |
| chr20:43467512-43469223 | Predicted MP | Predicted MP |
| chr20:44090755-44092779 | Predicted MP | Predicted MP |
| chr20:48239917-48242506 | Predicted MP | Predicted MP |
| chr20:49542196-49542893 | Predicted MP | Predicted MR |
| chr20:49850350-49852338 | Predicted MP | Predicted MP |
| chr20:51553681-51554299 | Predicted MP | Predicted MP |
| chr20:5381345-5382604   | Predicted MP | Predicted MP |
| chr20:54633319-54636034 | Predicted MR | Predicted MP |
| chr20:54636560-54640522 | Predicted MP | Predicted MP |
| chr20:5629968-5630474   | Predicted MP | Predicted MR |
| chr20:59951195-59957401 | Predicted MP | Predicted MP |
| chr20:60326337-60326899 | Predicted MP | Predicted MP |
| chr20:603757-605017     | Predicted MP | Predicted MP |
| chr20:60810004-60811781 | Predicted MP | Predicted MP |
| chr20:61027279-61028910 | Predicted MP | Predicted MR |
| chr20:61203456-61205120 | Predicted MP | Predicted MP |
| chr20:61278432-61281454 | Predicted MP | Predicted MP |
| chr20:61462411-61463563 | Predicted MP | Predicted MP |
| chr20:61753694-61755532 | Predicted MP | Predicted MP |
| chr20:61965739-61967738 | Predicted MP | Predicted MR |
| chr21:14273554-14274872 | Predicted MP | Predicted MR |
| chr21:23315494-23316252 | Predicted MP | Predicted MR |
| chr21:27259397-27262300 | Predicted MP | Predicted MP |
| chr21:29304752-29305364 | Predicted MP | Predicted MP |
| chr21:33327177-33328501 | Predicted MP | Predicted MP |
| chr21:34963113-34965348 | Predicted MP | Predicted MR |
| chr21:35181982-35185778 | Predicted MP | Predicted MP |
| chr21:36989817-36996214 | Predicted MP | Predicted MP |
| chr21:37001444-37003776 | Predicted MP | Predicted MP |
| chr21:38209552-38211183 | Predicted MP | Predicted MP |
| chr21:38953704-38955771 | Predicted MP | Predicted MP |
| chr21:39606022-39608560 | Predicted MP | Predicted MP |
| chr21:43267020-43269103 | Predicted MP | Predicted MR |
| chr21:43367264-43370511 | Predicted MP | Predicted MP |
| chr21:43876045-43876827 | Predicted MP | Predicted MP |
| chr21:43901739-43904673 | Predicted MP | Predicted MP |
| chr21:44108327-44110605 | Predicted MP | Predicted MP |
| chr21:44484461-44485910 | Predicted MP | Predicted MR |
| chr21:45797861-45800359 | Predicted MP | Predicted MP |
| chr21:45850569-45851254 | Predicted MP | Predicted MP |
| chr21:46942517-46944223 | Predicted MP | Predicted MR |
| chr22:15241675-15243066 | Predicted MP | Predicted MR |
| chr22:15974903-15977369 | Predicted MP | Predicted MP |
| chr22:17445901-17446894 | Predicted MP | Predicted MP |
| chr22:17531316-17532198 | Predicted MP | Predicted MP |
| chr22:18127580-18129771 | Predicted MP | Predicted MP |
| chr22:21120275-21120774 | Predicted MP | Predicted MP |
| chr22:22632614-22634541 | Predicted MP | Predicted MR |
| chr22:23274913-23277037 | Predicted MP | Predicted MR |

|                          |              |              |
|--------------------------|--------------|--------------|
| chr22:24002714-24004124  | Predicted MP | Predicted MR |
| chr22:24284813-24286187  | Predicted MP | Predicted MP |
| chr22:26334463-26335461  | Predicted MP | Predicted MP |
| chr22:28272219-28272772  | Predicted MP | Predicted MR |
| chr22:28966588-28967633  | Predicted MP | Predicted MP |
| chr22:30924230-30925239  | Predicted MP | Predicted MR |
| chr22:31521782-31522943  | Predicted MP | Predicted MP |
| chr22:33744517-33745323  | Predicted MP | Predicted MP |
| chr22:34748302-34750103  | Predicted MP | Predicted MR |
| chr22:36921959-36923697  | Predicted MP | Predicted MR |
| chr22:39670730-39672557  | Predicted MP | Predicted MR |
| chr22:41063466-41065129  | Predicted MP | Predicted MP |
| chr22:41327713-41328321  | Predicted MP | Predicted MP |
| chr22:41700947-41701616  | Predicted MP | Predicted MR |
| chr22:44751789-44753058  | Predicted MP | Predicted MR |
| chr22:46095110-46096024  | Predicted MP | Predicted MP |
| chr22:47291196-47293643  | Predicted MP | Predicted MR |
| chr22:48562134-48564798  | Predicted MP | Predicted MP |
| chr22:48925419-48927879  | Predicted MP | Predicted MP |
| chr22:49275086-49276125  | Predicted MP | Predicted MR |
| chr22:49328026-49330057  | Predicted MP | Predicted MP |
| chr22:49401881-49404144  | Predicted MP | Predicted MP |
| chr22:49448367-49449974  | Predicted MP | Predicted MR |
| chr3:108724245-108725579 | Predicted MP | Predicted MP |
| chr3:108726054-108727241 | Predicted MP | Predicted MP |
| chr3:11008808-11010632   | Predicted MP | Predicted MP |
| chr3:112272144-112274484 | Predicted MP | Predicted MP |
| chr3:116347929-116350073 | Predicted MP | Predicted MP |
| chr3:11735195-11737496   | Predicted MP | Predicted MR |
| chr3:121651646-121653184 | Predicted MP | Predicted MR |
| chr3:123715438-123716925 | Predicted MP | Predicted MP |
| chr3:124648797-124651862 | Predicted MP | Predicted MR |
| chr3:126575892-126577424 | Predicted MP | Predicted MP |
| chr3:126796338-126797844 | Predicted MP | Predicted MR |
| chr3:126939731-126940434 | Predicted MP | Predicted MR |
| chr3:128183941-128185721 | Predicted MP | Predicted MR |
| chr3:128791187-128793179 | Predicted MP | Predicted MP |
| chr3:135574669-135576724 | Predicted MP | Predicted MP |
| chr3:135996373-135998915 | Predicted MP | Predicted MP |
| chr3:137952747-137954800 | Predicted MP | Predicted MR |
| chr3:138971633-138973833 | Predicted MP | Predicted MP |
| chr3:142998731-142999480 | Predicted MP | Predicted MR |
| chr3:143077099-143079245 | Predicted MP | Predicted MR |
| chr3:148590950-148594668 | Predicted MR | Predicted MP |
| chr3:148596125-148597879 | Predicted MP | Predicted MP |
| chr3:148609598-148612032 | Predicted MP | Predicted MP |
| chr3:148619317-148620187 | Predicted MP | Predicted MP |
| chr3:14963378-14965604   | Predicted MP | Predicted MR |
| chr3:151170305-151172428 | Predicted MP | Predicted MP |
| chr3:151745967-151747579 | Predicted MP | Predicted MP |
| chr3:151803520-151804765 | Predicted MP | Predicted MP |



|                          |              |              |
|--------------------------|--------------|--------------|
| chr3:157070510-157072569 | Predicted MP | Predicted MP |
| chr3:15875235-15877232   | Predicted MP | Predicted MP |
| chr3:159305347-159308050 | Predicted MP | Predicted MP |
| chr3:161378888-161379389 | Predicted MP | Predicted MP |
| chr3:16900234-16902152   | Predicted MP | Predicted MP |
| chr3:170969674-170970469 | Predicted MP | Predicted MP |
| chr3:174595625-174596877 | Predicted MR | Predicted MP |
| chr3:17758256-17759730   | Predicted MP | Predicted MR |
| chr3:178396626-178398859 | Predicted MP | Predicted MR |
| chr3:184180275-184181743 | Predicted MP | Predicted MP |
| chr3:18440580-18442866   | Predicted MP | Predicted MP |
| chr3:185370510-185371360 | Predicted MP | Predicted MP |
| chr3:185448950-185450891 | Predicted MP | Predicted MP |
| chr3:185459909-185463520 | Predicted MP | Predicted MP |
| chr3:185580040-185582479 | Predicted MP | Predicted MP |
| chr3:187137462-187139575 | Predicted MP | Predicted MP |
| chr3:193608267-193610970 | Predicted MP | Predicted MP |
| chr3:194116887-194119070 | Predicted MP | Predicted MP |
| chr3:195688020-195690267 | Predicted MP | Predicted MP |
| chr3:195887495-195890484 | Predicted MR | Predicted MP |
| chr3:196978151-196979735 | Predicted MP | Predicted MP |
| chr3:197089423-197090980 | Predicted MP | Predicted MP |
| chr3:197458849-197459994 | Predicted MP | Predicted MP |
| chr3:198951238-198952775 | Predicted MP | Predicted MR |
| chr3:19963002-19964409   | Predicted MP | Predicted MP |
| chr3:213057-215427       | Predicted MP | Predicted MP |
| chr3:23218830-23220569   | Predicted MP | Predicted MP |
| chr3:24510481-24512700   | Predicted MP | Predicted MR |
| chr3:26638934-26640040   | Predicted MP | Predicted MP |
| chr3:32586308-32587986   | Predicted MP | Predicted MR |
| chr3:39399568-39401264   | Predicted MP | Predicted MR |
| chr3:39825313-39827291   | Predicted MP | Predicted MP |
| chr3:40325533-40327095   | Predicted MP | Predicted MP |
| chr3:40540904-40542004   | Predicted MP | Predicted MR |
| chr3:42597872-42599222   | Predicted MP | Predicted MR |
| chr3:44011159-44013892   | Predicted MP | Predicted MP |
| chr3:44257937-44258863   | Predicted MP | Predicted MR |
| chr3:48516106-48517129   | Predicted MP | Predicted MR |
| chr3:4994484-4997283     | Predicted MP | Predicted MP |
| chr3:51260624-51261619   | Predicted MP | Predicted MP |
| chr3:51964485-51965857   | Predicted MP | Predicted MP |
| chr3:53502833-53505350   | Predicted MP | Predicted MP |
| chr3:56476560-56478146   | Predicted MP | Predicted MP |
| chr3:57557678-57558824   | Predicted MP | Predicted MP |
| chr3:61521008-61525877   | Predicted MP | Predicted MP |
| chr3:62330760-62335122   | Predicted MP | Predicted MP |
| chr3:64645728-64647703   | Predicted MP | Predicted MP |
| chr3:6877383-6879690     | Predicted MP | Predicted MP |
| chr3:71566831-71568012   | Predicted MP | Predicted MP |
| chr3:71712943-71716180   | Predicted MP | Predicted MP |
| chr3:73019441-73020731   | Predicted MP | Predicted MP |

|                          |              |              |
|--------------------------|--------------|--------------|
| chr3:75420661-75421625   | Predicted MP | Predicted MR |
| chr3:75799584-75800264   | Predicted MR | Predicted MP |
| chr3:85050454-85050952   | Predicted MP | Predicted MR |
| chr3:87924111-87925092   | Predicted MP | Predicted MR |
| chr3:88189868-88191781   | Predicted MP | Predicted MP |
| chr3:9412695-9415185     | Predicted MP | Predicted MP |
| chr3:99933551-99935256   | Predicted MP | Predicted MP |
| chr4:102623941-102627112 | Predicted MP | Predicted MP |
| chr4:104104728-104106997 | Predicted MP | Predicted MP |
| chr4:105769592-105770817 | Predicted MP | Predicted MR |
| chr4:107599476-107600472 | Predicted MP | Predicted MP |
| chr4:109445151-109448147 | Predicted MP | Predicted MP |
| chr4:109450173-109452507 | Predicted MP | Predicted MP |
| chr4:1096192-1098190     | Predicted MP | Predicted MP |
| chr4:111474679-111477965 | Predicted MP | Predicted MP |
| chr4:120070153-120071113 | Predicted MP | Predicted MP |
| chr4:1208553-1209640     | Predicted MP | Predicted MP |
| chr4:1385856-1391972     | Predicted MP | Predicted MR |
| chr4:1397207-1399340     | Predicted MP | Predicted MP |
| chr4:141429078-141433529 | Predicted MP | Predicted MP |
| chr4:141531175-141532426 | Predicted MP | Predicted MP |
| chr4:142034195-142036009 | Predicted MP | Predicted MP |
| chr4:144124186-144126110 | Predicted MR | Predicted MP |
| chr4:146759993-146761816 | Predicted MP | Predicted MP |
| chr4:14679222-14683268   | Predicted MP | Predicted MP |
| chr4:147933425-147934595 | Predicted MP | Predicted MP |
| chr4:149720508-149725000 | Predicted MR | Predicted MP |
| chr4:153813370-153815761 | Predicted MP | Predicted MP |
| chr4:1548155-1549944     | Predicted MP | Predicted MP |
| chr4:156945527-156947136 | Predicted MP | Predicted MP |
| chr4:160381010-160383312 | Predicted MP | Predicted MP |
| chr4:167151783-167154089 | Predicted MR | Predicted MP |
| chr4:174665643-174668165 | Predicted MP | Predicted MP |
| chr4:174804632-174805997 | Predicted MR | Predicted MP |
| chr4:174833691-174835141 | Predicted MP | Predicted MP |
| chr4:1761533-1764675     | Predicted MP | Predicted MR |
| chr4:17698390-17700727   | Predicted MP | Predicted MP |
| chr4:184393654-184396749 | Predicted MP | Predicted MR |
| chr4:184800002-184802972 | Predicted MP | Predicted MR |
| chr4:191361321-191386837 | Predicted MP | Predicted MP |
| chr4:2310340-2310876     | Predicted MP | Predicted MR |
| chr4:2430896-2432433     | Predicted MP | Predicted MP |
| chr4:24708105-24709312   | Predicted MP | Predicted MP |
| chr4:25539767-25542246   | Predicted MP | Predicted MP |
| chr4:30396886-30401353   | Predicted MP | Predicted MR |
| chr4:37277502-37278604   | Predicted MP | Predicted MP |
| chr4:37492526-37493037   | Predicted MP | Predicted MP |
| chr4:38487030-38489513   | Predicted MP | Predicted MR |
| chr4:39800483-39802708   | Predicted MP | Predicted MP |
| chr4:41587619-41590826   | Predicted MR | Predicted MP |
| chr4:41993361-41996081   | Predicted MP | Predicted MP |

|                          |              |              |
|--------------------------|--------------|--------------|
| chr4:46232436-46233773   | Predicted MP | Predicted MP |
| chr4:48325825-48327728   | Predicted MR | Predicted MP |
| chr4:48749192-48749944   | Predicted MP | Predicted MP |
| chr4:54806661-54809181   | Predicted MP | Predicted MP |
| chr4:558192-562065       | Predicted MP | Predicted MP |
| chr4:57020899-57023394   | Predicted MP | Predicted MP |
| chr4:57528225-57529299   | Predicted MP | Predicted MR |
| chr4:57816410-57818147   | Predicted MP | Predicted MP |
| chr4:57930942-57931627   | Predicted MP | Predicted MP |
| chr4:6010010-6010731     | Predicted MP | Predicted MP |
| chr4:61894354-61897847   | Predicted MP | Predicted MP |
| chr4:664750-666166       | Predicted MP | Predicted MR |
| chr4:7629662-7630586     | Predicted MP | Predicted MR |
| chr4:78226276-78229660   | Predicted MP | Predicted MR |
| chr4:78434853-78436809   | Predicted MP | Predicted MP |
| chr4:79825584-79826140   | Predicted MP | Predicted MR |
| chr4:84813722-84815425   | Predicted MR | Predicted MP |
| chr4:85774375-85778281   | Predicted MP | Predicted MP |
| chr4:88497766-88499415   | Predicted MP | Predicted MP |
| chr5:10511435-10512231   | Predicted MP | Predicted MP |
| chr5:109052498-109054955 | Predicted MR | Predicted MP |
| chr5:11047156-11047761   | Predicted MP | Predicted MP |
| chr5:112317783-112318758 | Predicted MP | Predicted MP |
| chr5:115204859-115206488 | Predicted MP | Predicted MR |
| chr5:129267162-129269695 | Predicted MP | Predicted MP |
| chr5:131159694-131161542 | Predicted MP | Predicted MP |
| chr5:132019238-132020482 | Predicted MP | Predicted MR |
| chr5:133539623-133541266 | Predicted MP | Predicted MP |
| chr5:133887765-133891643 | Predicted MP | Predicted MP |
| chr5:134101317-134102787 | Predicted MP | Predicted MP |
| chr5:135293428-135294800 | Predicted MP | Predicted MP |
| chr5:137116473-137119096 | Predicted MP | Predicted MP |
| chr5:138116170-138118052 | Predicted MR | Predicted MP |
| chr5:139007319-139010761 | Predicted MP | Predicted MP |
| chr5:140844314-140845810 | Predicted MR | Predicted MP |
| chr5:14195542-14198633   | Predicted MR | Predicted MP |
| chr5:142762033-142765668 | Predicted MP | Predicted MP |
| chr5:146868866-146870314 | Predicted MP | Predicted MP |
| chr5:153804936-153806979 | Predicted MP | Predicted MP |
| chr5:153836928-153839588 | Predicted MP | Predicted MP |
| chr5:154114050-154117459 | Predicted MP | Predicted MR |
| chr5:167650736-167652070 | Predicted MP | Predicted MP |
| chr5:1697429-1698767     | Predicted MP | Predicted MP |
| chr5:170667516-170672740 | Predicted MP | Predicted MR |
| chr5:171546827-171548793 | Predicted MP | Predicted MR |
| chr5:171813337-171814827 | Predicted MP | Predicted MR |
| chr5:172686324-172690072 | Predicted MP | Predicted MR |
| chr5:17269349-17272441   | Predicted MP | Predicted MR |
| chr5:17328084-17329123   | Predicted MP | Predicted MP |
| chr5:173348438-173349706 | Predicted MP | Predicted MR |
| chr5:175724509-175726290 | Predicted MP | Predicted MR |

|                          |              |              |
|--------------------------|--------------|--------------|
| chr5:176320048-176320972 | Predicted MP | Predicted MR |
| chr5:176476126-176477579 | Predicted MP | Predicted MR |
| chr5:176951375-176952528 | Predicted MP | Predicted MR |
| chr5:177320928-177322160 | Predicted MP | Predicted MR |
| chr5:178771366-178772725 | Predicted MP | Predicted MP |
| chr5:180018360-180019249 | Predicted MP | Predicted MR |
| chr5:180459762-180461817 | Predicted MP | Predicted MR |
| chr5:18344743-18345739   | Predicted MP | Predicted MP |
| chr5:311401-315797       | Predicted MP | Predicted MR |
| chr5:346273-347160       | Predicted MP | Predicted MP |
| chr5:36276575-36278591   | Predicted MP | Predicted MP |
| chr5:3652149-3654532     | Predicted MR | Predicted MP |
| chr5:36911615-36913694   | Predicted MP | Predicted MP |
| chr5:373562-376358       | Predicted MP | Predicted MP |
| chr5:40716535-40718109   | Predicted MP | Predicted MP |
| chr5:43015767-43016607   | Predicted MP | Predicted MP |
| chr5:43077514-43079480   | Predicted MR | Predicted MP |
| chr5:444236-446089       | Predicted MP | Predicted MR |
| chr5:45730903-45732631   | Predicted MR | Predicted MP |
| chr5:49997651-49999899   | Predicted MP | Predicted MP |
| chr5:52811010-52812804   | Predicted MP | Predicted MR |
| chr5:53641276-53642980   | Predicted MP | Predicted MP |
| chr5:54638796-54639787   | Predicted MP | Predicted MR |
| chr5:60661908-60665876   | Predicted MP | Predicted MP |
| chr5:65271246-65272046   | Predicted MP | Predicted MP |
| chr5:65927294-65929571   | Predicted MP | Predicted MR |
| chr5:6826497-6827767     | Predicted MP | Predicted MR |
| chr5:72711750-72714505   | Predicted MP | Predicted MP |
| chr5:73971205-73972908   | Predicted MP | Predicted MP |
| chr5:74842089-74843929   | Predicted MP | Predicted MR |
| chr5:75734297-75735793   | Predicted MP | Predicted MP |
| chr5:76046153-76048499   | Predicted MP | Predicted MP |
| chr5:76541464-76543242   | Predicted MR | Predicted MP |
| chr5:79985468-79986756   | Predicted MP | Predicted MP |
| chr5:81081107-81083907   | Predicted MP | Predicted MP |
| chr5:87946810-87947703   | Predicted MP | Predicted MP |
| chr5:88016322-88017354   | Predicted MR | Predicted MP |
| chr5:88214534-88215304   | Predicted MP | Predicted MP |
| chr5:89805079-89806891   | Predicted MP | Predicted MR |
| chr5:89889771-89890989   | Predicted MP | Predicted MR |
| chr5:92945120-92947306   | Predicted MP | Predicted MP |
| chr6:101956378-101957143 | Predicted MP | Predicted MR |
| chr6:10519098-10521916   | Predicted MP | Predicted MR |
| chr6:10522067-10523717   | Predicted MP | Predicted MR |
| chr6:107066409-107067891 | Predicted MP | Predicted MP |
| chr6:107916563-107919682 | Predicted MR | Predicted MP |
| chr6:108361709-108362559 | Predicted MP | Predicted MP |
| chr6:108561447-108562321 | Predicted MR | Predicted MP |
| chr6:108596060-108598347 | Predicted MP | Predicted MP |
| chr6:114397775-114399719 | Predicted MP | Predicted MP |
| chr6:114769555-114771575 | Predicted MP | Predicted MP |

|                          |              |              |
|--------------------------|--------------|--------------|
| chr6:117697803-117699290 | Predicted MR | Predicted MP |
| chr6:117909872-117911695 | Predicted MR | Predicted MP |
| chr6:12119126-12121745   | Predicted MP | Predicted MR |
| chr6:125324429-125326419 | Predicted MP | Predicted MP |
| chr6:125664018-125665152 | Predicted MP | Predicted MR |
| chr6:127480709-127483784 | Predicted MP | Predicted MP |
| chr6:130381182-130383986 | Predicted MP | Predicted MR |
| chr6:1323099-1325346     | Predicted MP | Predicted MR |
| chr6:13241534-13242245   | Predicted MP | Predicted MP |
| chr6:1326542-1328034     | Predicted MP | Predicted MR |
| chr6:1333895-1336598     | Predicted MP | Predicted MR |
| chr6:133603322-133605955 | Predicted MP | Predicted MP |
| chr6:134537306-134538911 | Predicted MP | Predicted MP |
| chr6:13681983-13683358   | Predicted MP | Predicted MP |
| chr6:137154119-137156349 | Predicted MR | Predicted MP |
| chr6:137283641-137287332 | Predicted MP | Predicted MP |
| chr6:143307254-143310820 | Predicted MP | Predicted MR |
| chr6:144426182-144427914 | Predicted MR | Predicted MP |
| chr6:147869447-147872608 | Predicted MP | Predicted MP |
| chr6:149679404-149681442 | Predicted MP | Predicted MP |
| chr6:153542793-153545272 | Predicted MP | Predicted MP |
| chr6:15355929-15357514   | Predicted MP | Predicted MR |
| chr6:154922408-154924345 | Predicted MP | Predicted MP |
| chr6:155099751-155100754 | Predicted MP | Predicted MP |
| chr6:1558885-1561097     | Predicted MP | Predicted MR |
| chr6:157189991-157193488 | Predicted MP | Predicted MP |
| chr6:157771225-157774092 | Predicted MP | Predicted MP |
| chr6:162730162-162730772 | Predicted MP | Predicted MP |
| chr6:166044029-166048494 | Predicted MP | Predicted MP |
| chr6:166550068-166554007 | Predicted MR | Predicted MP |
| chr6:166635949-166638240 | Predicted MP | Predicted MR |
| chr6:167282472-167286723 | Predicted MP | Predicted MP |
| chr6:167805278-167807364 | Predicted MP | Predicted MP |
| chr6:168184753-168185450 | Predicted MP | Predicted MR |
| chr6:16867792-16871027   | Predicted MP | Predicted MR |
| chr6:168790715-168792710 | Predicted MP | Predicted MP |
| chr6:168887013-168887511 | Predicted MP | Predicted MP |
| chr6:170369116-170370932 | Predicted MP | Predicted MR |
| chr6:170515492-170519096 | Predicted MR | Predicted MP |
| chr6:170721937-170723671 | Predicted MP | Predicted MR |
| chr6:20046873-20047752   | Predicted MP | Predicted MP |
| chr6:20509283-20512568   | Predicted MP | Predicted MP |
| chr6:21695021-21697252   | Predicted MP | Predicted MP |
| chr6:21702176-21705241   | Predicted MP | Predicted MP |
| chr6:22677225-22678845   | Predicted MP | Predicted MP |
| chr6:26100043-26101393   | Predicted MP | Predicted MP |
| chr6:2709860-2712038     | Predicted MP | Predicted MR |
| chr6:28577427-28578286   | Predicted MP | Predicted MP |
| chr6:29703355-29704544   | Predicted MP | Predicted MP |
| chr6:29828137-29829261   | Predicted MP | Predicted MP |
| chr6:30052055-30053321   | Predicted MR | Predicted MP |

|                          |              |              |
|--------------------------|--------------|--------------|
| chr6:30762278-30762918   | Predicted MP | Predicted MP |
| chr6:31805337-31806548   | Predicted MP | Predicted MR |
| chr6:31976699-31978653   | Predicted MP | Predicted MP |
| chr6:32330514-32331265   | Predicted MP | Predicted MP |
| chr6:33485591-33487082   | Predicted MP | Predicted MP |
| chr6:34219577-34221963   | Predicted MP | Predicted MR |
| chr6:34230309-34231055   | Predicted MP | Predicted MR |
| chr6:34310234-34314443   | Predicted MP | Predicted MP |
| chr6:34467288-34469118   | Predicted MP | Predicted MP |
| chr6:3461574-3462631     | Predicted MP | Predicted MP |
| chr6:35288777-35290777   | Predicted MP | Predicted MP |
| chr6:35415632-35416457   | Predicted MP | Predicted MP |
| chr6:35571843-35574317   | Predicted MP | Predicted MR |
| chr6:37429406-37430986   | Predicted MP | Predicted MP |
| chr6:37771589-37775410   | Predicted MR | Predicted MP |
| chr6:39388675-39390416   | Predicted MP | Predicted MP |
| chr6:41447064-41451908   | Predicted MP | Predicted MP |
| chr6:43845301-43848176   | Predicted MP | Predicted MP |
| chr6:44313318-44314245   | Predicted MP | Predicted MR |
| chr6:45497050-45500112   | Predicted MP | Predicted MP |
| chr6:47384155-47386039   | Predicted MP | Predicted MR |
| chr6:53037571-53038797   | Predicted MP | Predicted MR |
| chr6:53767071-53769299   | Predicted MP | Predicted MR |
| chr6:71048501-71049777   | Predicted MR | Predicted MP |
| chr6:74367251-74367993   | Predicted MP | Predicted MP |
| chr6:75968274-75969274   | Predicted MP | Predicted MP |
| chr6:82517732-82520594   | Predicted MP | Predicted MP |
| chr6:86408016-86410865   | Predicted MP | Predicted MP |
| chr6:91061196-91064016   | Predicted MP | Predicted MP |
| chr6:99378898-99380049   | Predicted MP | Predicted MP |
| chr6:99385590-99390997   | Predicted MP | Predicted MP |
| chr7:100399168-100403101 | Predicted MP | Predicted MP |
| chr7:100599027-100601203 | Predicted MP | Predicted MP |
| chr7:101582065-101582574 | Predicted MP | Predicted MR |
| chr7:107489676-107490210 | Predicted MP | Predicted MP |
| chr7:1102217-1103882     | Predicted MP | Predicted MR |
| chr7:113318444-113322175 | Predicted MP | Predicted MP |
| chr7:116556549-116559075 | Predicted MP | Predicted MP |
| chr7:116713227-116714276 | Predicted MP | Predicted MP |
| chr7:1258993-1259581     | Predicted MP | Predicted MP |
| chr7:127369513-127371192 | Predicted MP | Predicted MP |
| chr7:127400230-127402513 | Predicted MP | Predicted MP |
| chr7:127474413-127475581 | Predicted MP | Predicted MP |
| chr7:127639234-127640581 | Predicted MP | Predicted MP |
| chr7:127922909-127923831 | Predicted MP | Predicted MP |
| chr7:130247329-130250591 | Predicted MP | Predicted MP |
| chr7:134651478-134652723 | Predicted MP | Predicted MP |
| chr7:136010644-136013744 | Predicted MR | Predicted MP |
| chr7:137805787-137807363 | Predicted MP | Predicted MR |
| chr7:138250159-138252235 | Predicted MP | Predicted MP |
| chr7:140225311-140228147 | Predicted MP | Predicted MP |

|                          |              |              |
|--------------------------|--------------|--------------|
| chr7:142593939-142596162 | Predicted MP | Predicted MP |
| chr7:143036134-143037251 | Predicted MP | Predicted MP |
| chr7:145250239-145252093 | Predicted MR | Predicted MP |
| chr7:1476961-1481306     | Predicted MP | Predicted MP |
| chr7:148224805-148226549 | Predicted MP | Predicted MP |
| chr7:148593994-148596100 | Predicted MP | Predicted MR |
| chr7:148906223-148907140 | Predicted MP | Predicted MP |
| chr7:149332965-149333463 | Predicted MP | Predicted MR |
| chr7:150532131-150532633 | Predicted MP | Predicted MP |
| chr7:151569449-151571972 | Predicted MP | Predicted MR |
| chr7:153123352-153124070 | Predicted MP | Predicted MR |
| chr7:154663704-154667661 | Predicted MP | Predicted MP |
| chr7:154748996-154751804 | Predicted MP | Predicted MP |
| chr7:155084155-155084848 | Predicted MP | Predicted MP |
| chr7:155094775-155098966 | Predicted MP | Predicted MP |
| chr7:156295839-156299020 | Predicted MP | Predicted MP |
| chr7:156312653-156314413 | Predicted MR | Predicted MP |
| chr7:156980603-156986547 | Predicted MP | Predicted MP |
| chr7:157130734-157131373 | Predicted MP | Predicted MP |
| chr7:157439013-157441469 | Predicted MP | Predicted MP |
| chr7:157776667-157777632 | Predicted MP | Predicted MP |
| chr7:157901449-157902015 | Predicted MP | Predicted MP |
| chr7:158265314-158267045 | Predicted MP | Predicted MR |
| chr7:1974024-1974715     | Predicted MP | Predicted MP |
| chr7:2076911-2077459     | Predicted MP | Predicted MR |
| chr7:2190694-2191193     | Predicted MP | Predicted MP |
| chr7:23280578-23284596   | Predicted MP | Predicted MP |
| chr7:23286396-23287822   | Predicted MP | Predicted MP |
| chr7:2331298-2333504     | Predicted MP | Predicted MP |
| chr7:25762985-25764889   | Predicted MP | Predicted MP |
| chr7:26012645-26015588   | Predicted MP | Predicted MP |
| chr7:26857070-26857937   | Predicted MP | Predicted MP |
| chr7:26968472-26970179   | Predicted MP | Predicted MP |
| chr7:27000509-27002425   | Predicted MP | Predicted MP |
| chr7:27991856-27994155   | Predicted MP | Predicted MP |
| chr7:281159-281853       | Predicted MP | Predicted MR |
| chr7:28768126-28771980   | Predicted MP | Predicted MP |
| chr7:31148840-31150121   | Predicted MP | Predicted MP |
| chr7:35070057-35072275   | Predicted MP | Predicted MP |
| chr7:35612955-35615132   | Predicted MP | Predicted MR |
| chr7:36009375-36010092   | Predicted MP | Predicted MP |
| chr7:44137378-44139055   | Predicted MP | Predicted MP |
| chr7:45733042-45734887   | Predicted MR | Predicted MP |
| chr7:4647516-4648339     | Predicted MP | Predicted MR |
| chr7:4695563-4696992     | Predicted MP | Predicted MP |
| chr7:50300939-50301685   | Predicted MP | Predicted MP |
| chr7:5095298-5096730     | Predicted MP | Predicted MR |
| chr7:5125337-5125849     | Predicted MP | Predicted MR |
| chr7:5235271-5242525     | Predicted MP | Predicted MP |
| chr7:54387788-54389231   | Predicted MP | Predicted MP |
| chr7:62531674-62533047   | Predicted MP | Predicted MR |

|                          |              |              |
|--------------------------|--------------|--------------|
| chr7:63481082-63482136   | Predicted MP | Predicted MR |
| chr7:65523172-65523935   | Predicted MP | Predicted MP |
| chr7:68506617-68509923   | Predicted MP | Predicted MR |
| chr7:72436845-72438407   | Predicted MP | Predicted MP |
| chr7:72482066-72483928   | Predicted MP | Predicted MP |
| chr7:73933466-73934836   | Predicted MP | Predicted MP |
| chr7:78727269-78728687   | Predicted MR | Predicted MP |
| chr7:79408223-79410016   | Predicted MR | Predicted MP |
| chr7:8246111-8248784     | Predicted MP | Predicted MP |
| chr7:84459089-84460941   | Predicted MP | Predicted MP |
| chr7:882980-884173       | Predicted MP | Predicted MP |
| chr7:92106526-92111243   | Predicted MP | Predicted MP |
| chr7:98111557-98113142   | Predicted MP | Predicted MP |
| chr7:99419109-99420620   | Predicted MP | Predicted MP |
| chr7:99670123-99672943   | Predicted MP | Predicted MP |
| chr7:99677634-99679717   | Predicted MP | Predicted MR |
| chr7:99780771-99782467   | Predicted MP | Predicted MP |
| chr8:101432308-101433143 | Predicted MP | Predicted MP |
| chr8:102031586-102034945 | Predicted MP | Predicted MP |
| chr8:10229254-10230375   | Predicted MP | Predicted MR |
| chr8:102573425-102576035 | Predicted MP | Predicted MP |
| chr8:105669346-105671248 | Predicted MP | Predicted MP |
| chr8:10623880-10628834   | Predicted MP | Predicted MP |
| chr8:109163269-109165320 | Predicted MP | Predicted MP |
| chr8:111055020-111056308 | Predicted MP | Predicted MP |
| chr8:11587127-11588422   | Predicted MP | Predicted MP |
| chr8:11602570-11605718   | Predicted MP | Predicted MP |
| chr8:116748775-116751080 | Predicted MP | Predicted MP |
| chr8:11696987-11698474   | Predicted MP | Predicted MR |
| chr8:119702867-119703795 | Predicted MP | Predicted MR |
| chr8:12088228-12090362   | Predicted MP | Predicted MR |
| chr8:121892223-121894236 | Predicted MP | Predicted MP |
| chr8:12337499-12339597   | Predicted MP | Predicted MR |
| chr8:123861272-123864621 | Predicted MP | Predicted MR |
| chr8:125452628-125454955 | Predicted MP | Predicted MR |
| chr8:126510446-126513760 | Predicted MP | Predicted MP |
| chr8:127637541-127640373 | Predicted MP | Predicted MP |
| chr8:131020264-131022048 | Predicted MP | Predicted MR |
| chr8:131097044-131098659 | Predicted MP | Predicted MP |
| chr8:132121001-132124275 | Predicted MP | Predicted MP |
| chr8:141536251-141537589 | Predicted MP | Predicted MP |
| chr8:143588344-143589870 | Predicted MP | Predicted MP |
| chr8:144319379-144321455 | Predicted MP | Predicted MP |
| chr8:1443769-1444426     | Predicted MP | Predicted MP |
| chr8:144887080-144888659 | Predicted MP | Predicted MP |
| chr8:145121897-145124453 | Predicted MP | Predicted MP |
| chr8:145175178-145179657 | Predicted MP | Predicted MP |
| chr8:145525984-145529068 | Predicted MP | Predicted MP |
| chr8:145657905-145659725 | Predicted MP | Predicted MR |
| chr8:1784661-1786415     | Predicted MP | Predicted MR |
| chr8:19658138-19659790   | Predicted MR | Predicted MP |



|                          |              |              |
|--------------------------|--------------|--------------|
| chr8:19840818-19842666   | Predicted MP | Predicted MP |
| chr8:21961962-21963086   | Predicted MP | Predicted MP |
| chr8:22478400-22479910   | Predicted MP | Predicted MP |
| chr8:22602939-22609362   | Predicted MP | Predicted MP |
| chr8:22912393-22913967   | Predicted MP | Predicted MP |
| chr8:24868558-24870581   | Predicted MP | Predicted MP |
| chr8:27834834-27835870   | Predicted MP | Predicted MP |
| chr8:28298485-28300548   | Predicted MP | Predicted MP |
| chr8:28314359-28315803   | Predicted MP | Predicted MP |
| chr8:31615884-31618241   | Predicted MP | Predicted MP |
| chr8:32524561-32526690   | Predicted MP | Predicted MR |
| chr8:37818092-37819444   | Predicted MP | Predicted MP |
| chr8:37903558-37904527   | Predicted MP | Predicted MR |
| chr8:38950631-38951910   | Predicted MR | Predicted MP |
| chr8:41622797-41623762   | Predicted MP | Predicted MR |
| chr8:4838448-4840124     | Predicted MP | Predicted MP |
| chr8:50984640-50986129   | Predicted MR | Predicted MP |
| chr8:54014005-54017130   | Predicted MP | Predicted MP |
| chr8:54953993-54958143   | Predicted MP | Predicted MP |
| chr8:61753018-61756027   | Predicted MP | Predicted MP |
| chr8:627146-628784       | Predicted MP | Predicted MR |
| chr8:65444001-65445962   | Predicted MR | Predicted MP |
| chr8:6679033-6680982     | Predicted MP | Predicted MP |
| chr8:67513668-67514506   | Predicted MP | Predicted MP |
| chr8:70906562-70910202   | Predicted MP | Predicted MP |
| chr8:71144169-71147802   | Predicted MR | Predicted MP |
| chr8:71476512-71479258   | Predicted MP | Predicted MR |
| chr8:74919264-74919862   | Predicted MP | Predicted MP |
| chr8:86537745-86538491   | Predicted MR | Predicted MP |
| chr8:868948-869760       | Predicted MP | Predicted MP |
| chr8:97574669-97577068   | Predicted MP | Predicted MP |
| chr8:9797875-9798788     | Predicted MP | Predicted MP |
| chr8:98686391-98686891   | Predicted MP | Predicted MP |
| chr9:102793-105227       | Predicted MP | Predicted MR |
| chr9:107112888-107113471 | Predicted MP | Predicted MP |
| chr9:107329046-107332714 | Predicted MP | Predicted MP |
| chr9:107617147-107617814 | Predicted MP | Predicted MR |
| chr9:111439843-111442111 | Predicted MP | Predicted MR |
| chr9:120336325-120337367 | Predicted MP | Predicted MR |
| chr9:120916015-120917528 | Predicted MR | Predicted MP |
| chr9:121492756-121494011 | Predicted MP | Predicted MP |
| chr9:122067267-122071179 | Predicted MR | Predicted MP |
| chr9:122552639-122553137 | Predicted MP | Predicted MR |
| chr9:122693441-122694405 | Predicted MP | Predicted MP |
| chr9:122708651-122709153 | Predicted MP | Predicted MP |
| chr9:123771152-123772544 | Predicted MP | Predicted MR |
| chr9:123840917-123842551 | Predicted MP | Predicted MP |
| chr9:123856704-123860772 | Predicted MP | Predicted MP |
| chr9:125030724-125032177 | Predicted MP | Predicted MP |
| chr9:125249494-125251230 | Predicted MP | Predicted MP |
| chr9:125587565-125590969 | Predicted MP | Predicted MR |

|                          |              |              |
|--------------------------|--------------|--------------|
| chr9:126546970-126547892 | Predicted MP | Predicted MR |
| chr9:126564305-126565896 | Predicted MP | Predicted MP |
| chr9:127626461-127628677 | Predicted MP | Predicted MP |
| chr9:129015581-129020993 | Predicted MP | Predicted MR |
| chr9:130563985-130567055 | Predicted MP | Predicted MP |
| chr9:130568020-130572153 | Predicted MP | Predicted MP |
| chr9:131255413-131255952 | Predicted MP | Predicted MR |
| chr9:131298397-131300170 | Predicted MP | Predicted MP |
| chr9:132066164-132069777 | Predicted MP | Predicted MP |
| chr9:13268129-13270103   | Predicted MP | Predicted MR |
| chr9:133961261-133963784 | Predicted MP | Predicted MR |
| chr9:133970318-133970904 | Predicted MP | Predicted MP |
| chr9:134582229-134584907 | Predicted MP | Predicted MP |
| chr9:135151694-135152192 | Predicted MP | Predicted MP |
| chr9:135192702-135193923 | Predicted MP | Predicted MR |
| chr9:136319136-136321615 | Predicted MP | Predicted MP |
| chr9:136608175-136610706 | Predicted MP | Predicted MP |
| chr9:136939440-136940008 | Predicted MP | Predicted MP |
| chr9:137391849-137393121 | Predicted MP | Predicted MP |
| chr9:137620549-137622437 | Predicted MP | Predicted MP |
| chr9:138011168-138013351 | Predicted MP | Predicted MP |
| chr9:16859687-16862243   | Predicted MP | Predicted MP |
| chr9:2004456-2008311     | Predicted MP | Predicted MP |
| chr9:29201756-29204256   | Predicted MP | Predicted MP |
| chr9:32990840-32992002   | Predicted MP | Predicted MR |
| chr9:33014666-33015895   | Predicted MP | Predicted MP |
| chr9:34028789-34029442   | Predicted MP | Predicted MP |
| chr9:3515080-3517239     | Predicted MP | Predicted MR |
| chr9:35479458-35480814   | Predicted MP | Predicted MP |
| chr9:35679596-35681440   | Predicted MP | Predicted MR |
| chr9:36975606-36977214   | Predicted MR | Predicted MP |
| chr9:36992222-36993278   | Predicted MP | Predicted MP |
| chr9:4287485-4290471     | Predicted MP | Predicted MP |
| chr9:44701454-44702680   | Predicted MP | Predicted MR |
| chr9:5996768-5998714     | Predicted MP | Predicted MP |
| chr9:67244931-67246128   | Predicted MR | Predicted MP |
| chr9:69515982-69517969   | Predicted MP | Predicted MP |
| chr9:71754512-71756472   | Predicted MP | Predicted MP |
| chr9:71993523-71994675   | Predicted MP | Predicted MP |
| chr9:74697380-74698069   | Predicted MP | Predicted MP |
| chr9:76858282-76861540   | Predicted MR | Predicted MP |
| chr9:76862569-76865820   | Predicted MR | Predicted MP |
| chr9:83551375-83553273   | Predicted MP | Predicted MR |
| chr9:83648114-83648612   | Predicted MP | Predicted MP |
| chr9:83792119-83793278   | Predicted MP | Predicted MP |
| chr9:85943096-85944781   | Predicted MP | Predicted MP |
| chr9:88378361-88380826   | Predicted MP | Predicted MP |
| chr9:90643068-90644283   | Predicted MP | Predicted MP |
| chr9:91790228-91792789   | Predicted MP | Predicted MP |
| chr9:93792792-93797918   | Predicted MR | Predicted MP |
| chr9:94007310-94009296   | Predicted MP | Predicted MP |

|                          |              |              |
|--------------------------|--------------|--------------|
| chr9:95347343-95351492   | Predicted MP | Predicted MP |
| chr9:97644842-97646098   | Predicted MP | Predicted MP |
| chr9:98648997-98650325   | Predicted MP | Predicted MP |
| chrX:101203128-101203762 | Predicted MP | Predicted MR |
| chrX:102668600-102669691 | Predicted MP | Predicted MR |
| chrX:106498403-106500093 | Predicted MP | Predicted MP |
| chrX:107784362-107786921 | Predicted MR | Predicted MP |
| chrX:109051409-109053070 | Predicted MP | Predicted MP |
| chrX:11204853-11206002   | Predicted MP | Predicted MP |
| chrX:11441961-11444411   | Predicted MP | Predicted MP |
| chrX:117890025-117892659 | Predicted MR | Predicted MP |
| chrX:118706757-118708179 | Predicted MP | Predicted MP |
| chrX:124062192-124065625 | Predicted MP | Predicted MP |
| chrX:125440206-125441122 | Predicted MP | Predicted MP |
| chrX:12740280-12741242   | Predicted MP | Predicted MP |
| chrX:128841559-128844512 | Predicted MP | Predicted MR |
| chrX:133408536-133409926 | Predicted MP | Predicted MR |
| chrX:134380263-134381756 | Predicted MP | Predicted MP |
| chrX:135304200-135305758 | Predicted MP | Predicted MR |
| chrX:152459105-152461231 | Predicted MP | Predicted MR |
| chrX:152805373-152806836 | Predicted MP | Predicted MP |
| chrX:153126890-153129361 | Predicted MP | Predicted MP |
| chrX:153270318-153271772 | Predicted MP | Predicted MR |
| chrX:17637817-17639701   | Predicted MP | Predicted MP |
| chrX:18202624-18204386   | Predicted MP | Predicted MR |
| chrX:23109694-23113539   | Predicted MP | Predicted MP |
| chrX:25683177-25683676   | Predicted MP | Predicted MP |
| chrX:258884-260318       | Predicted MP | Predicted MP |
| chrX:272350-276708       | Predicted MP | Predicted MP |
| chrX:3256371-3258860     | Predicted MR | Predicted MP |
| chrX:368142-369130       | Predicted MP | Predicted MP |
| chrX:39620294-39623124   | Predicted MP | Predicted MP |
| chrX:39627357-39631073   | Predicted MP | Predicted MP |
| chrX:39705283-39706523   | Predicted MP | Predicted MR |
| chrX:39709380-39715163   | Predicted MP | Predicted MR |
| chrX:39719676-39725722   | Predicted MP | Predicted MP |
| chrX:39766807-39772131   | Predicted MP | Predicted MP |
| chrX:39782756-39785507   | Predicted MP | Predicted MR |
| chrX:39789513-39792828   | Predicted MP | Predicted MP |
| chrX:40477750-40478399   | Predicted MP | Predicted MR |
| chrX:47632016-47632722   | Predicted MP | Predicted MR |
| chrX:47754276-47754946   | Predicted MP | Predicted MR |
| chrX:48445671-48447404   | Predicted MP | Predicted MP |
| chrX:50389841-50390667   | Predicted MP | Predicted MR |
| chrX:52869813-52871412   | Predicted MP | Predicted MP |
| chrX:52993488-52995449   | Predicted MP | Predicted MP |
| chrX:54266609-54268718   | Predicted MP | Predicted MP |
| chrX:560242-563412       | Predicted MP | Predicted MP |
| chrX:62757590-62758543   | Predicted MP | Predicted MP |
| chrX:67696301-67697472   | Predicted MP | Predicted MR |
| chrX:72005250-72007302   | Predicted MP | Predicted MP |

|                        |              |              |
|------------------------|--------------|--------------|
| chrX:72565697-72566744 | Predicted MP | Predicted MP |
| chrX:73926708-73928479 | Predicted MR | Predicted MP |
| chrX:9562999-9565140   | Predicted MP | Predicted MR |
| chrX:99467628-99472901 | Predicted MP | Predicted MP |
| chrY:12514030-12514966 | Predicted MP | Predicted MP |
| chrY:14607414-14607961 | Predicted MP | Predicted MP |
| chrY:258884-260318     | Predicted MP | Predicted MP |
| chrY:272350-276708     | Predicted MP | Predicted MP |
| chrY:368142-369130     | Predicted MP | Predicted MP |
| chrY:560242-563412     | Predicted MP | Predicted MP |

**Supplementary Table 3.** Partial list of genes predicted by SUPER-PatMAN to be methylation-prone with evidence for cancer-associated hypermethylation.

| Gene     | PubMed ID | Gene   | PubMed ID | Gene     | PubMed ID |
|----------|-----------|--------|-----------|----------|-----------|
| ADAMTS9  | 16799631  | GATA6  | 18162535  | PAX5     | 12907641  |
| ALDH1A3  | 16367923  | GBX2   | 16778180  | PAX7     | 16912168  |
| ARF4     | 16900213  | GPR7   | 17437806  | PMP24    | 14712230  |
| BAHRHL2  | 18162535  | GRIN2B | 18158559  | POU3F3   | 16900213  |
| C9orf64  | 17303177  | GRM7   | 15059895  | PROX1    | 12874782  |
| CBLN2    | 18162535  | HAND1  | 12438262  | PTCH     | 17295047  |
| CBLN4    | 18162535  | HIC1   | 7585125   | RFX1     | 15334059  |
| CCND2    | 7529333   | HOXA7  | 17369352  | RUNX3    | 11955451  |
| CDC4     | 17909001  | HRK    | 14695142  | SALL3    | 18094410  |
| CDH11    | 18162535  | IGFBP7 | 17334979  | SALL4    | 17546590  |
| CDKN1B   | 11042700  | ING1   | 15677627  | SERPINH1 | 15231663  |
| CDKN2C   | 16207477  | JUN    | 12506033  | SHH      | 18162535  |
| CDX2     | 15706431  | KCNK15 | 16707430  | SHOX     | 18162535  |
| CFTR     | 15526362  | KLF4   | 14724568  | SIM2     | 10655057  |
| CLDN7    | 12673207  | LAMA3  | 14695139  | SIX2     | 16912168  |
| COMP     | 16444255  | LHX1   | 12839967  | SOCS1    | 11326271  |
| CSMD1    | 16153303  | LHX2   | 16912168  | SOCS2    | 15361843  |
| CTNNA1   | 17159988  | LHX6   | 16732332  | SOX9     | 18087279  |
| DAB2IP   | 12446720  | LRP15  | 15840217  | SYK      | 11454707  |
| DACT1    | 15580286  | MAD1L1 | 18162535  | TBX3     | 16367923  |
| DCC      | 11461076  | MEIS2  | 18162535  | TCF2     | 16479257  |
| DSC2     | 16168112  | MINT1  | 11839573  | THSD2    | 10359534  |
| DVL1     | 15256063  | MXI1   | 15574775  | TIMP3    | 9916800   |
| EFEMP2   | 16778180  | MYOD1  | 2385586   | TITF1    | 17504987  |
| EGR2     | 14596916  | NFATC1 | 18156209  | TLL1     | 15467763  |
| EGR3     | 15342380  | NKX6.1 | 17363581  | TLX2     | 16778180  |
| EMX2     | 15342380  | NKX6.2 | 18162535  | TOP1     | 8938793   |
| EYA4     | 15824152  | NR2E1  | 18162535  | TPM1     | 12065096  |
| FGFR2    | 17456767  | NR2F2  | 18162535  | WNT2     | 18162535  |
| FLJ45983 | 16575877  | NTN1   | 17967459  | WNT9A    | 16707430  |
| FOXA2    | 15205324  | NTSR1  | 15467763  | ZIC1     | 17369352  |
| FOXD2    | 18162535  | OTX2   | 18162535  | ZIC4     | 18162535  |
| FRAT1    | 15251184  | PARK2  | 16287063  | ZIC5     | 18162535  |
| GATA4    | 14612389  |        |           |          |           |

**Supplementary Table 4.** WNT, Hedgehog, Notch, and TGF-beta pathway genes predicted to be methylation-prone by SUPER-PatMAN with evidence of cancer-associated hypermethylation.

| <b>Gene</b> | <b>PubMed ID</b> |
|-------------|------------------|
| CCND2       | 14506731         |
| DVL1        | 15256063         |
| FRAT1       | 15251184         |
| WNT2        | 16444255         |
| WNT9A       | 16707430         |
| WNT10B      | 17761539         |
| WNT11       | 16318277         |
| PTCH        | 17295047         |
| COMP        | 16444255         |
